# Supplementary material for: Kruppel-like factor 4-dependent Staufen1-mediated mRNA decay regulates cortical neurogenesis
Source: PubMed Central journal article supplement (PMC5785957; doi:10.1038/s41467-017-02720-9), 2018-01-26
Supplement: 41467_2017_2720_MOESM1_ESM.pdf [file 41467_2017_2720_MOESM1_ESM.pdf]

## SUPPLEMENTARY FIGURE LEGENDS

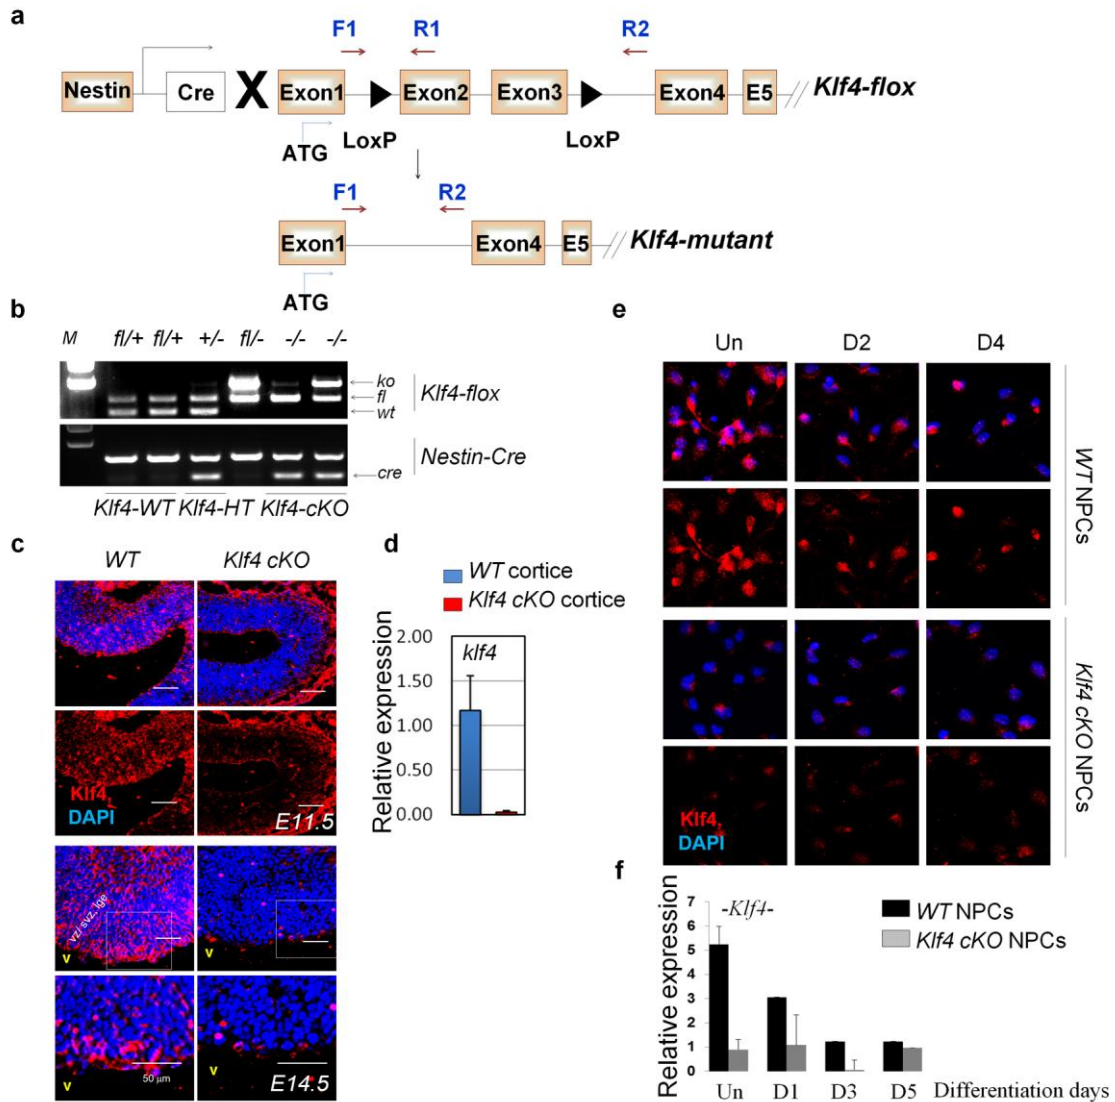

**Supplementary Figure 1. Generation of *Klf4* conditional knockout mice.** (a, b) *Nestin-cre* mice were crossed with *Klf4*<sup>fl/+</sup> or *Klf4*<sup>fl/fl</sup> mice to generate *wild-type* and *Klf4* conditional knockout embryos. Genotyping was performed with indicated primers. (b) Upper band is *Klf4* knockout, middle band is floxed, and lower band indicates wild-type. Left lane (*M*) indicates size

marker. (c) Fixed cyro-embedded coronal sections from E11.5 or E14.5 mouse forebrain stained with antibodies against *Klf4* (red). DAPI (blue). Scale bars, 50  $\mu\text{m}$ . (d) qPCR analysis of *Klf4* mRNA cortices equivalent to those shown in (c, lower panel). (e) Immunostaining to detect *Klf4* expression in *wild-type* and *Klf4 cKO* NPCs. Nuclear staining shown by DAPI (blue). Scale bar, 50  $\mu\text{m}$ . (f) qPCR analysis of *Klf4* levels in *wild-type* and *Klf4* NPCs at indicated days (d) of differentiation (n=2-3).

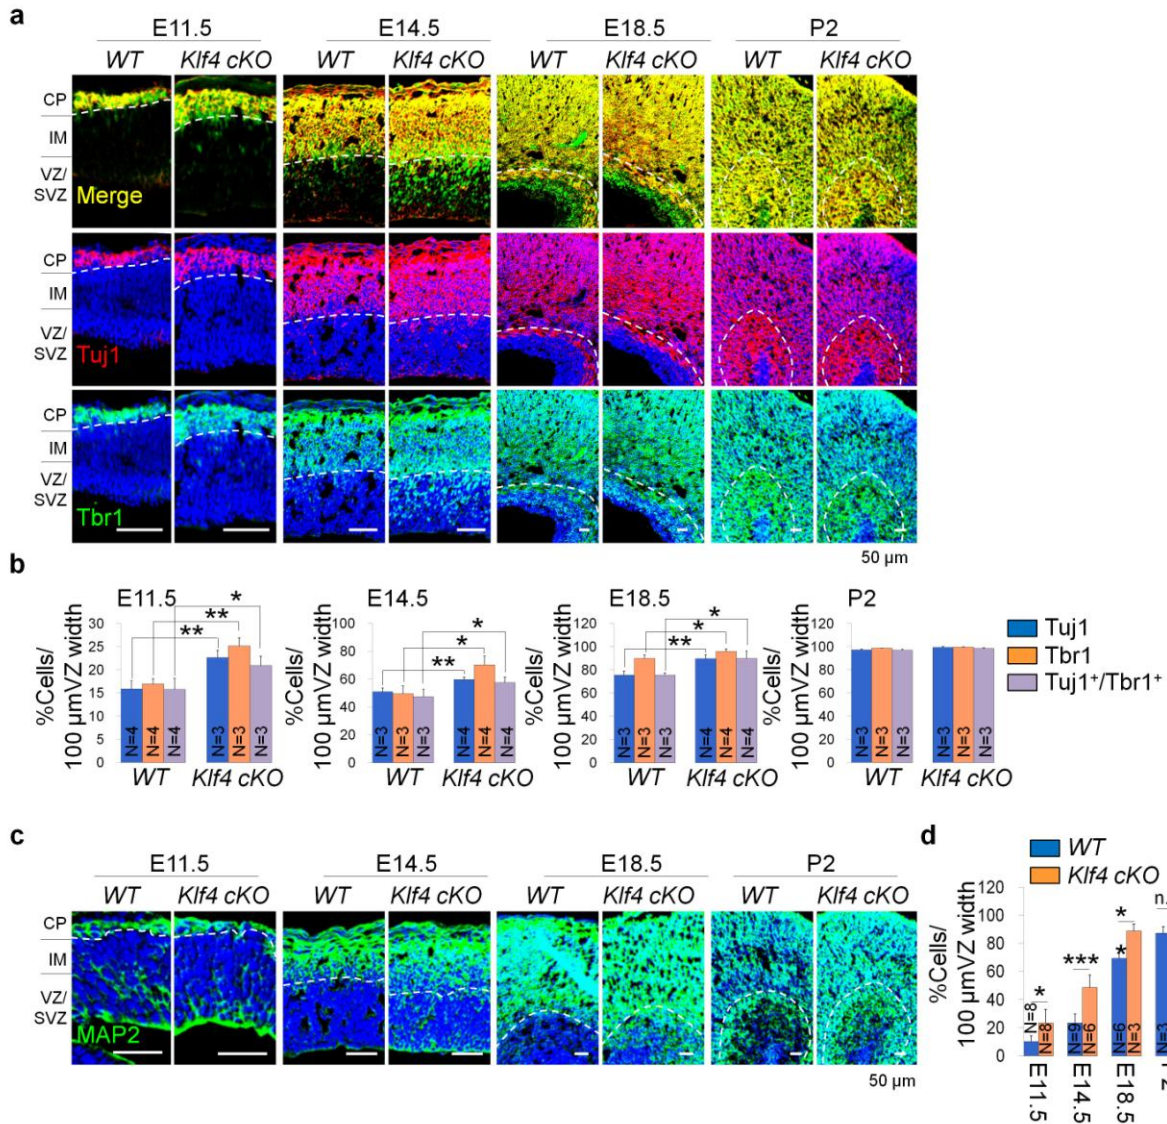

**Supplementary Figure 2. Klf4 down-regulation enhances neurogenesis *in vivo*.** (a, c) Fixed coronal sections from E11.5, E14.5, E18.5 or P2 mouse forebrain stained with antibodies against Tuj1 (red), Tbr1 (green) or Map2 (green). DAPI (blue). (b, d) Images shown above were quantified in cortex areas of 100  $\mu\text{m}$  ventricular width extending from VZ to the pial surface (E11.5: *Klf4*<sup>f/+</sup> (WT), n=4-8, *Klf4* cKO, n=3-8, and E14.5: *Klf4*<sup>f/+</sup> (WT), n=3-9, *Klf4* cKO, n=4-6, E18.5: *Klf4*<sup>f/+</sup> (WT), n=3-6, *Klf4* cKO, n=3-4, P2: *Klf4*<sup>f/+</sup> (WT), n=3, *Klf4* cKO, n=3). Scale bars, 50  $\mu\text{m}$ . Values correspond to mean $\pm$ SD. t-tests were performed to calculate significance (\*P < 0.05, \*\*P < 0.005, \*\*\*P < 0.0005).

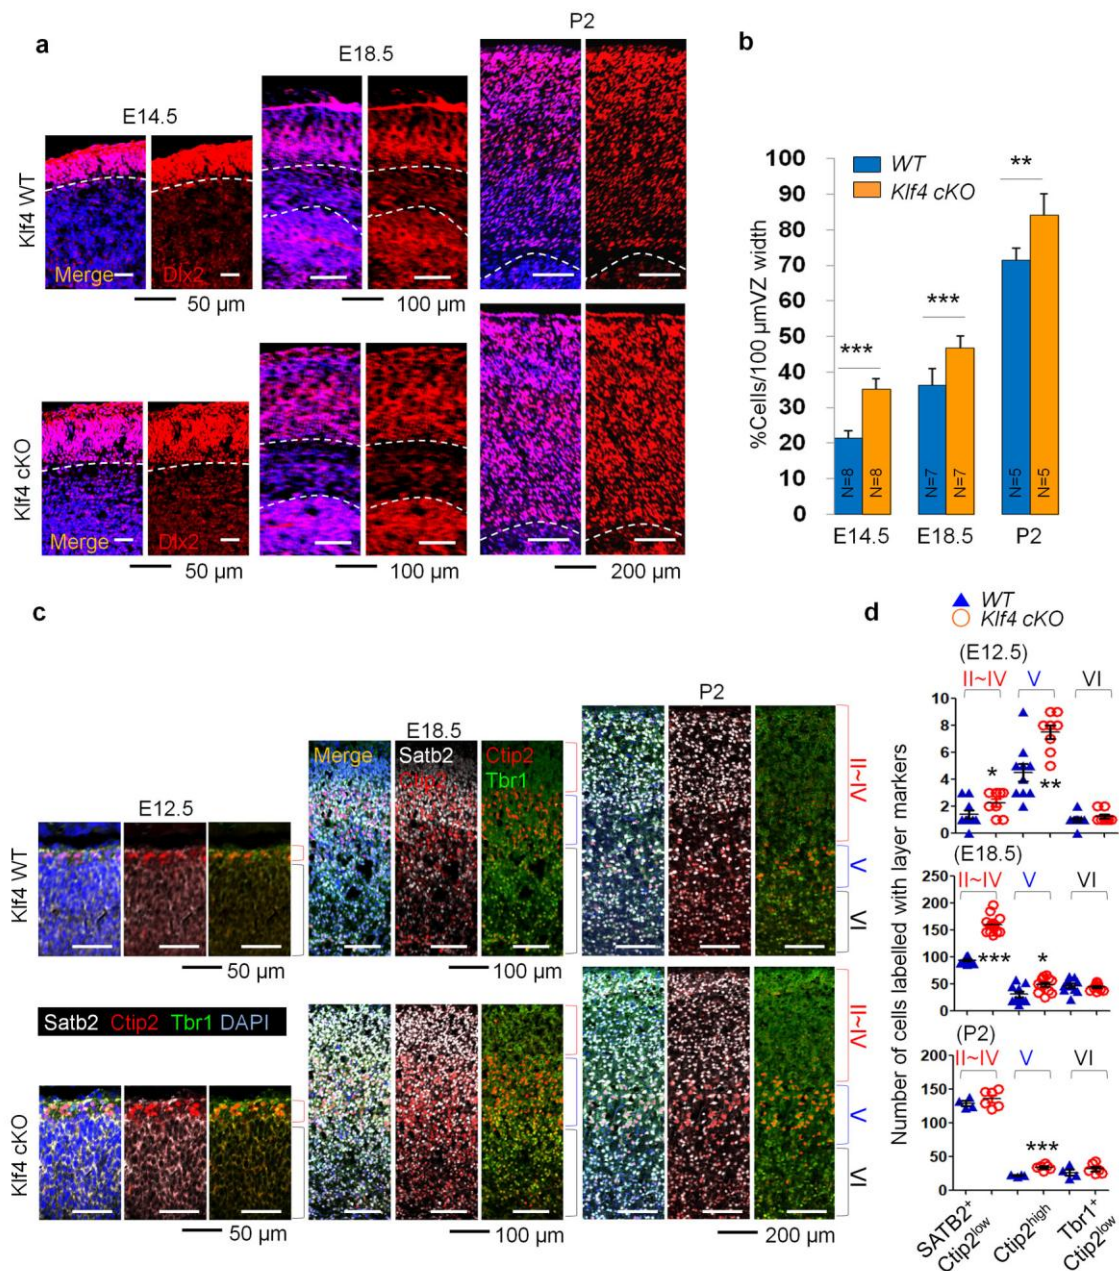

**Supplementary Figure 3. Klf4 down-regulation enhances deep layer corticogenesis *in vivo*.**

(a) Fixed coronal sections from E14.5, E18.5 or P2 mouse forebrain stained with antibodies against Dlx2 (red). DAPI (blue). (b) Images shown in (a) were quantified in cortex in areas of 100 μm ventricular width extending from VZ to the pial surface in E14.5 (n=8/genotype), E18.5 (n=7/genotype), and P2 (n=5/genotype). (c) Representative immuno-labeling of E12.5, E18.5

and P2 cortical sections with indicated antibodies revealing cortical layering in WT and *Nestin<sup>cre</sup>:Klf4 cKO* mice. (d) Quantification of (c) numbers over brackets denote cortical layers where the cells were counted. CTIP2<sup>low</sup> (layer 6) and CTIP2<sup>high</sup> (layer 5) expressing cells were used to differentiate between Tbr1<sup>+</sup>/CTIP2<sup>low</sup> cells of layer 5 and CTIP2<sup>high</sup> cells in layer 5. SATB2<sup>+</sup>/CTIP2<sup>-</sup> cells were counted above layer of CTIP2<sup>high</sup> cells in E12.5 (n=8~10/genotype), E18.5 (n=10~12/genotype), and P2 (n=4~6/genotype). Values correspond to mean±SD. t-tests were performed to calculate significance (\*P < 0.05, \*\*P < 0.005, \*\*\*P < 0.0005).

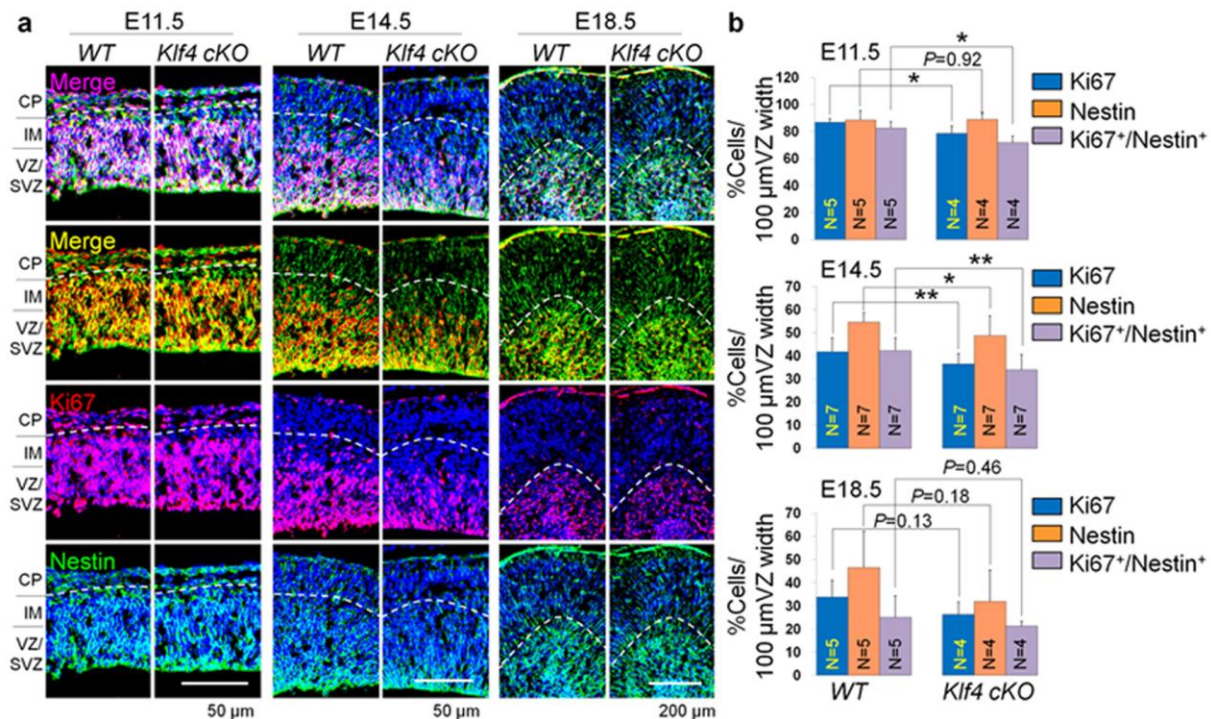

**Supplementary Figure 4. Klf4 down-regulation enhances neuronal maturation and decreases proliferative neural progenitor population in developmental neocortex.** (a) Fixed coronal sections from E11.5, E14.5, or E18.5 mouse forebrain stained with antibodies against Nestin (green) and Ki67 (red). DAPI (blue). (b) Images shown above were quantified in cortex

in areas of 100  $\mu\text{m}$  ventricular width extending from VZ to the pial surface. Scale bars, 50  $\mu\text{m}$ . Values correspond to mean $\pm$ SD. *t*-tests were performed to calculate significance (\**P* < 0.05, \*\**P* < 0.005).

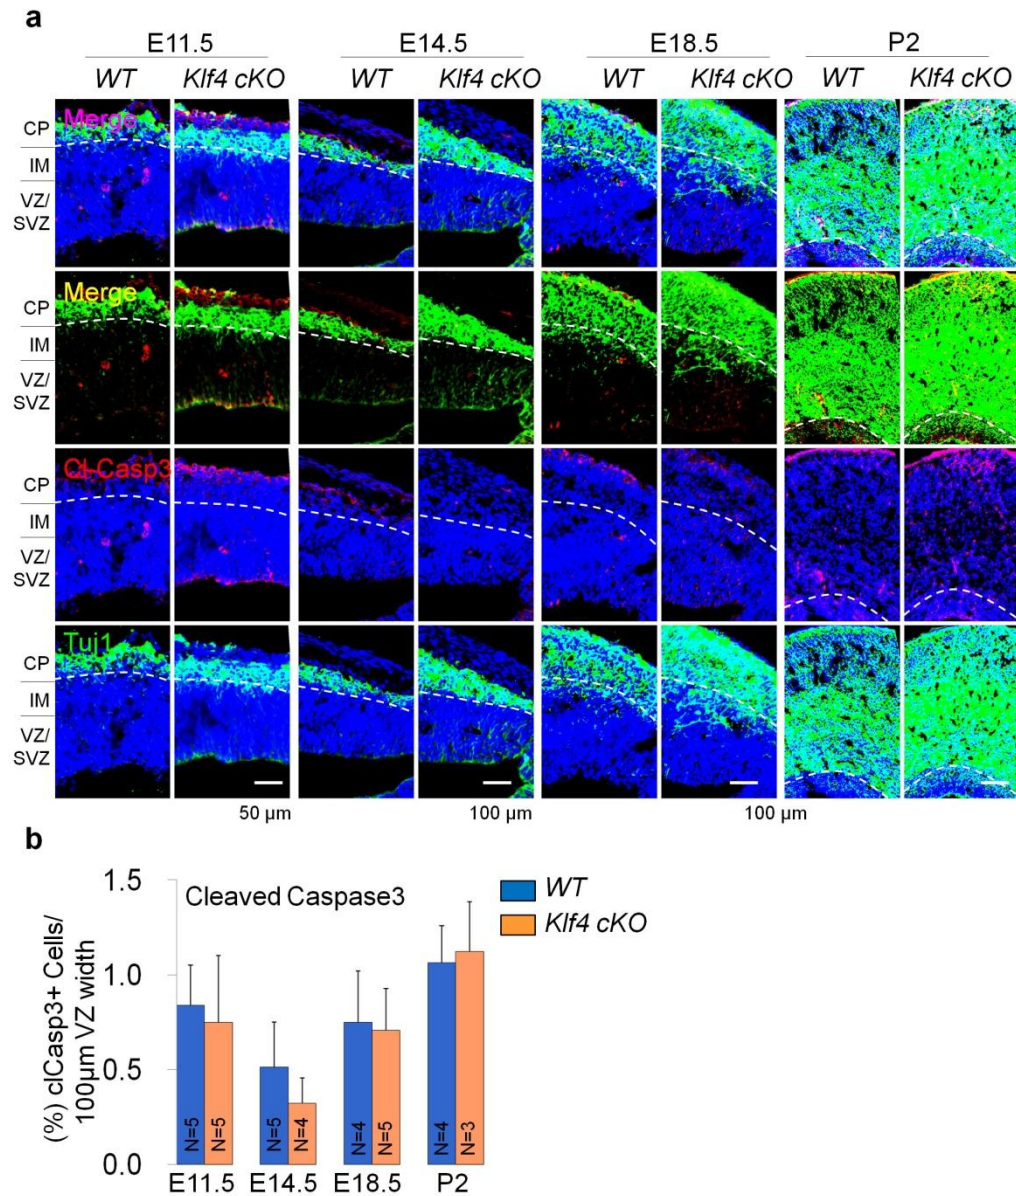

**Supplementary Figure 5. *Klf4* down-regulation does not change cell death of progenitors and neurons in developmental neocortex.** (a) Representative immuno-labeling for apoptotic cells with clCasp3 and neuronal marker TuJ1 in coronal telencephalic sections from E11.5, E14.5, or P2 mice. (b) Apoptosis of cells were quantified in cortex in areas of 100 mm ventricular width

extending from VZ to the pial surface (E11.5: *Klf4*<sup>fl/+</sup> (WT), n=5, *Klf4* cKO, n=5, and E14.5: *Klf4*<sup>fl/+</sup> (WT), n=5, *Klf4* cKO, n=4, E18.5: *Klf4*<sup>fl/+</sup> (WT), n=4, *Klf4* cKO, n=5, P2: *Klf4*<sup>fl/+</sup> (WT), n=4, *Klf4* cKO, n=3). Scale bars, 50 or 100  $\mu$ m. Values correspond to mean $\pm$ SD. *t*-tests were performed to calculate significance.

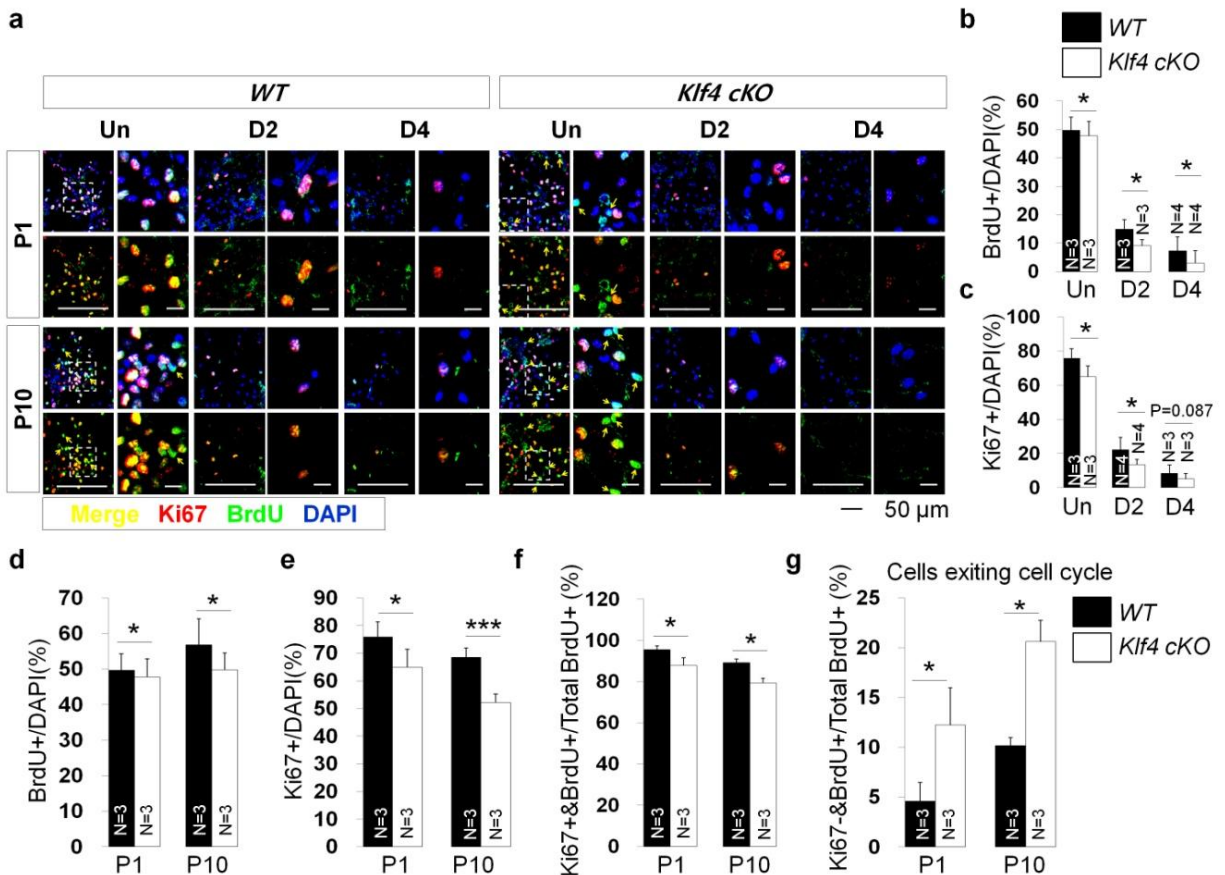

**Supplementary Figure 6. *Klf4* down-regulation decreases proliferative neural progenitor**

**cells and increases cells exiting cell cycle.** (a) Representative immuno-labeling for Ki67 and BrdU in the P1 (passage 1) or P10 (passage 10) NPCs pulsed with BrdU (30  $\mu$ g/ml) for 5 hrs. The area outlined by dotted lines is magnified in the adjacent images. Un, undifferentiation; D2, differentiation 2 days *in vitro*; D4, differentiation 4 days *in vitro*. Yellow arrows indicate cells exiting cell cycle which are Ki67 negative cells incorporated BrdU in the S phase. (b-e) Quantification of (a). Histogram showing percent stained cells relative to the number of DAPI<sup>+</sup>

nuclei. Scale bar, 50  $\mu$ m. D, differentiation days *in vitro*. (f) Fraction of Ki67<sup>+</sup>BrdU<sup>+</sup> cells in total BrdU<sup>+</sup> cell population. (g) Fraction of cells exiting the cell cycle defined as fraction of Ki67<sup>-</sup>BrdU<sup>+</sup> cells in total BrdU<sup>+</sup> cell population. Scale bars, 50  $\mu$ m. Values correspond to mean $\pm$ SD. *t*-tests were performed to calculate significance (\**P* < 0.05, \*\**P* < 0.005, \*\*\**P* < 0.0005).

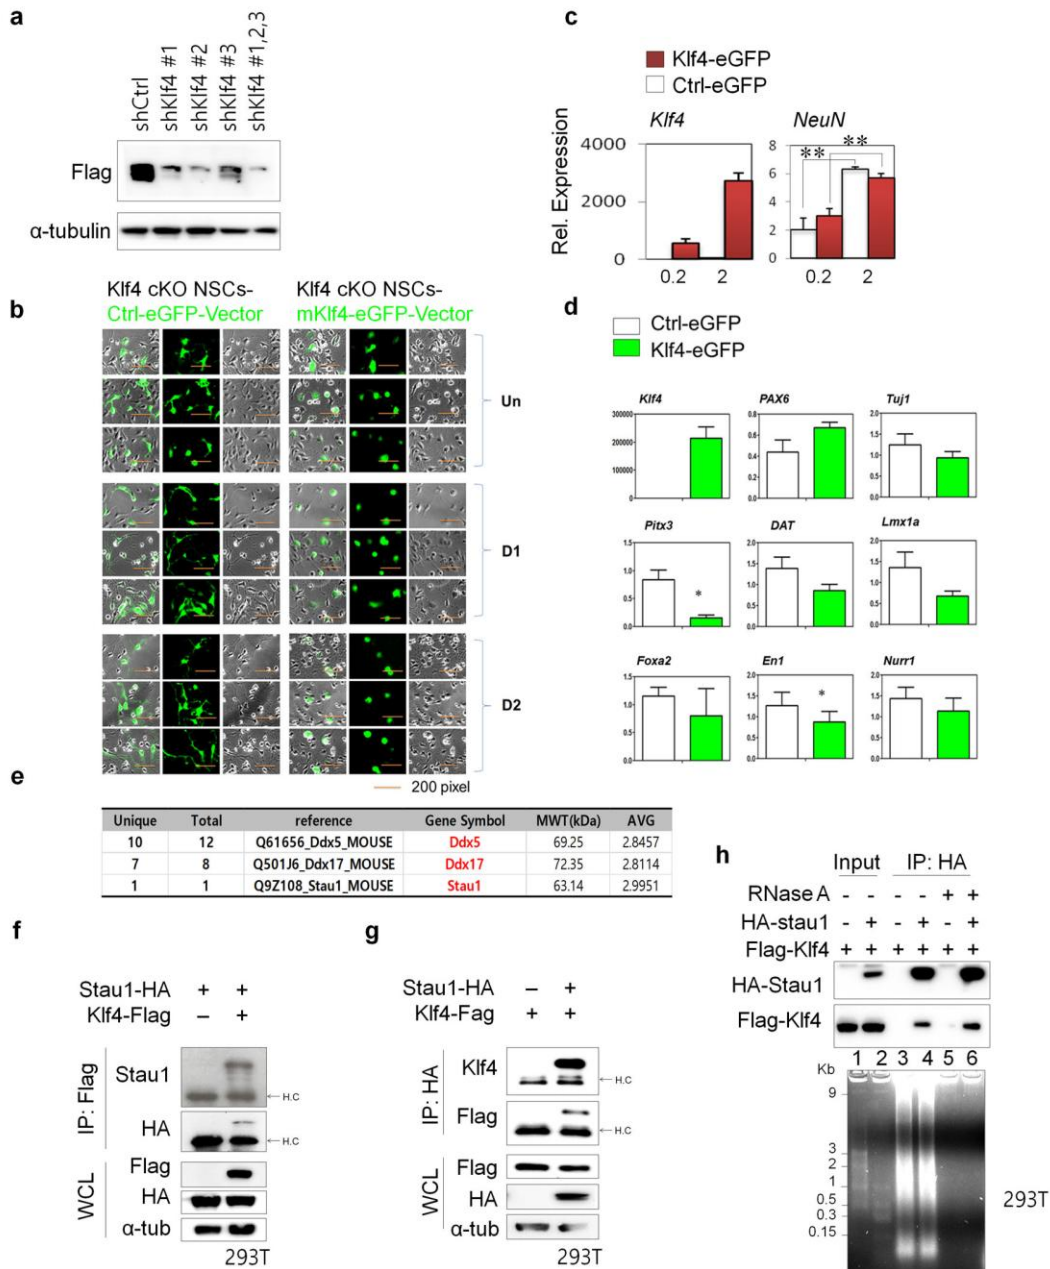

**Supplementary Figure 7. Klf4 regulates NPC neuronal differentiation and interacts with post-transcriptional regulators.** (a) NPCs expressing Flag-Klf4 were transfected with pLKO.1-



shScramble or pLKO.1-shKlf4 #1, #2, and #3, and one day later, Flag and  $\alpha$ -tubulin in lysates were detected by immunoblotting (n=2). **(b)** *Klf4* cKO NPCs transfected with *Control-EGFP* vector or *Klf4-EGFP* vector. GFP<sup>+</sup> cells were assessed after 1 or 2 days of culture in N2 medium. **(c, d)** qPCR analysis of indicated transcripts in samples equivalent to those shown in (b) (n=3). **(e)** MS spectrometry analysis with Flag-Klf4 in NPCs **(f, g)** Co-Immunoprecipitation (co-IP) of HA-tagged Stau1 or Flag-tagged Klf4 in HEK293T cells transfected with these constructs. **(h)** (upper) Co-IP of above samples with or without RNase A (10 $\mu$ g/ml). Values correspond to mean $\pm$ SD. *t*-tests were performed to calculate significance (\*P < 0.05, \*\*P < 0.005). (lower) Agarose gel of total RNA in above samples were separated with standard electrophoresis procedures. We used a 7.5 $\times$ 10 cm mini-gel horizontal system (C.B.S. Scientific) to run a 1.5% agarose gel at 100 V (6 V/cm) for 2 h. Marker lanes (1–2) contained commercial RNA ladders (1. New England Bio Labs ssRNA ladder #No362s, 2. NEB low Range ssRNA ladder #No364s). Lane 3 and 4, total RNA in IP lysates without RNase A (10 $\mu$ g/ml). Lane 5 and 6, total RNA in IP lysates with RNase A (10 $\mu$ g/ml). RNA ladders and each total RNA samples were premixed with 2xRNA loading dye (Thermo Scientific, #Ro641). The bands were visualized using Molecular Imager<sup>®</sup> Gel Doc<sup>™</sup> XR+ (Bio-Rad). See also Supplementary Figs. 19, 20.

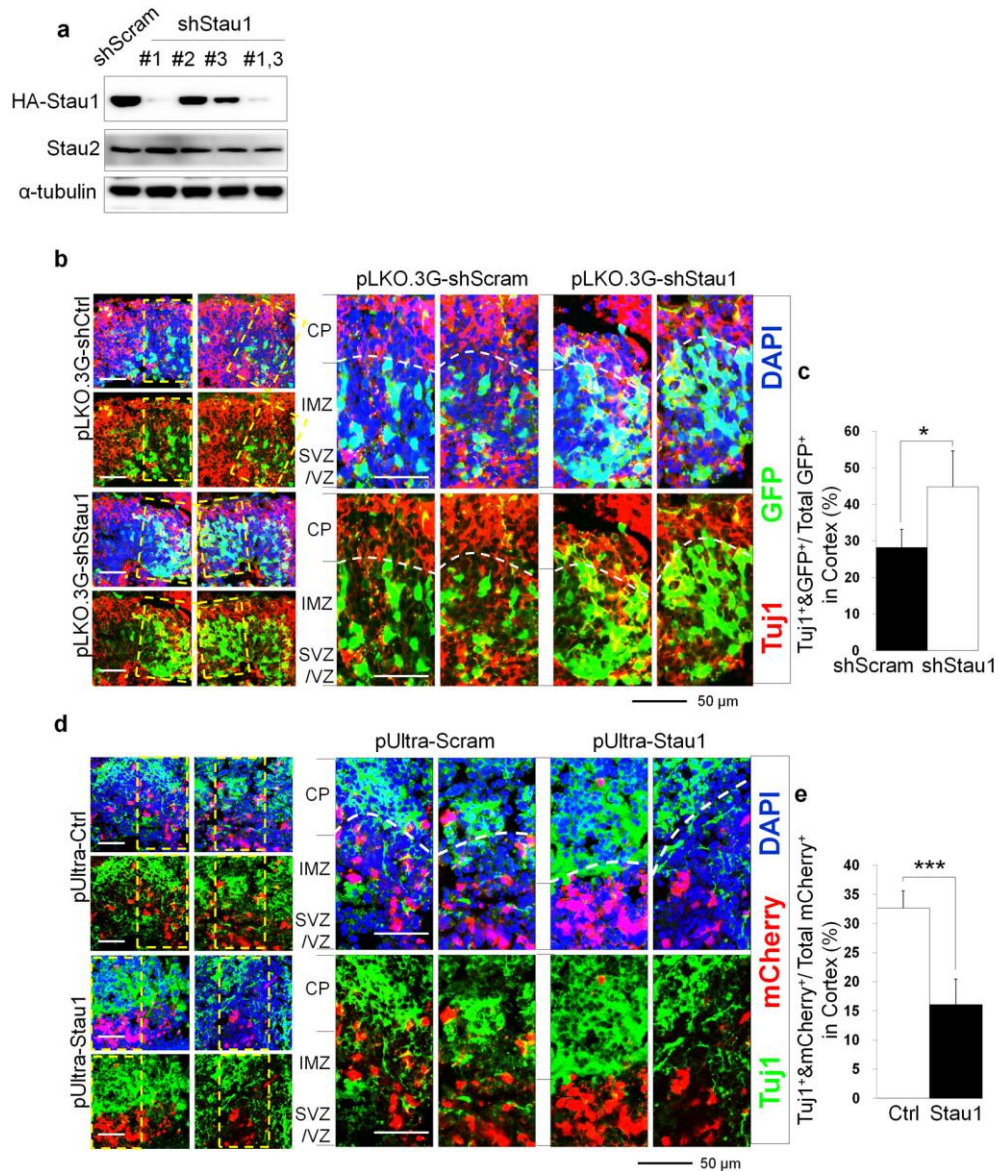

**Supplementary Figure 8. Stau1 regulates NPC neuronal differentiation *in vivo*.** (a) NPCs were infected with pLKO.1-shScramble or pLKO.1-shStau1 #1, #2, and #3, and one day later, Stau1, Stau2 and  $\alpha$ -tubulin in lysates were detected by immunoblotting (n=2). (b) Effect of Stau1 knockdown on embryonic mouse cortex. Green fluorescent images indicate GFP labeled shScramble or shStau1 expression in electroporated embryo brain. CP, cortical plate; IMZ, intermediate zone; SVZ/VZ, (sub)ventricular zone. (c) The effect of Stau1 knockdown on

neurogenesis was evaluated by counting Tuj1 (red)/EGFP (green) double positive cells versus total EGFP-positive cells in cortex. shScramble (n=4), shStau1 (n=6). **(d)** Effect of Stau1 overexpression on embryonic mouse cortex. Red fluorescent images indicates mCherry labeled control or mStau1 expression in electroporated embryo brain. CP, cortical plate; IMZ, intermediate zone; SVZ/VZ, (sub)ventricular zone. **(e)** The effect of Stau1 overexpression on neurogenesis was evaluated by counting Tuj1(green)/mCherry(red) double positive cells versus total mCherry-positive cells in cortex. Control (n=5), Stau1 (n=7). Values correspond to mean $\pm$ SD. *t*-tests were performed to calculate significance (\*P < 0.05, \*\*P < 0.005). See also Supplementary Fig. 20.

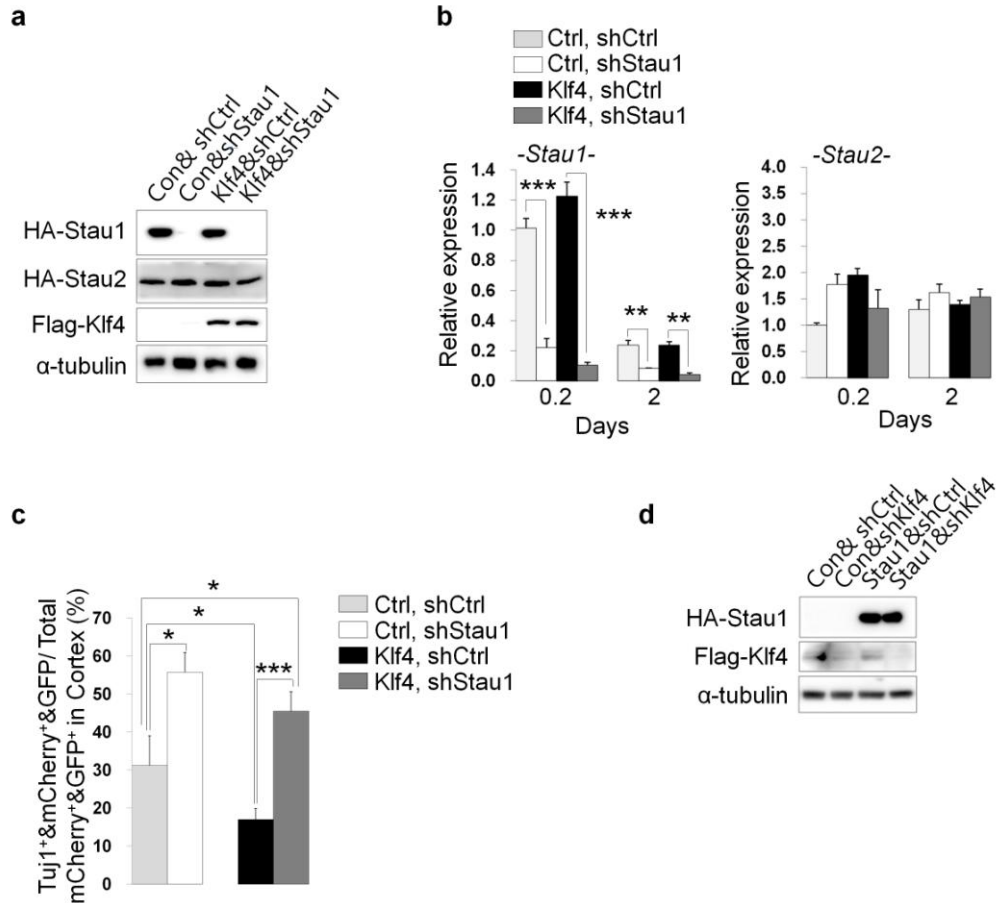

**Supplementary Figure 9. Stau1 rescues defect of neurogenesis seen in Klf4 overexpression**

*in vivo*. (a) Immunoblot of indicated antibodies in Klf4-overexpressing or control NPCs infected with pLKO.1 shScramble or pLKO.1 shStau1 lentivirus (n=1-2). (b) RT-qPCR of indicated transcripts in samples shown in (a) (n=3). (c) The rescue effect of Stau1 knockdown on neurogenesis was evaluated by counting Tuj1<sup>+</sup>mCherry<sup>+</sup>GFP<sup>+</sup> triple positive cells versus total mCherry<sup>+</sup>GFP<sup>+</sup> cells in electroporated cortex. shScramble/Control (n=3), shStau1/Control (n=3), shScramble/Klf4 (n=3), shStau1/Klf4 (n=6). (d) Immunoblots of indicated antibodies in Stau1-overexpressing or control NPCs infected with pLKO.1 shScramble or pLKO.1 shKlf4 lentivirus (n=1). Values correspond to mean±SD. Anova tests were performed to calculate significance (\*P < 0.01, \*\*P < 0.001, \*\*\*P < 0.0001). See also Supplementary Table 4, Supplementary Fig. 20.

**a**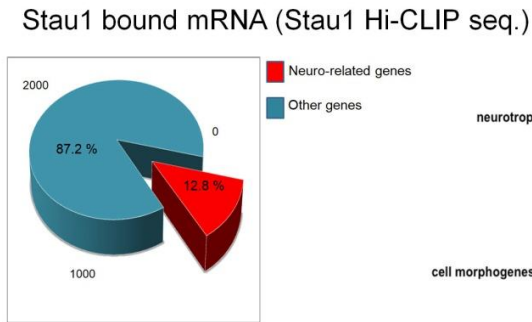**b**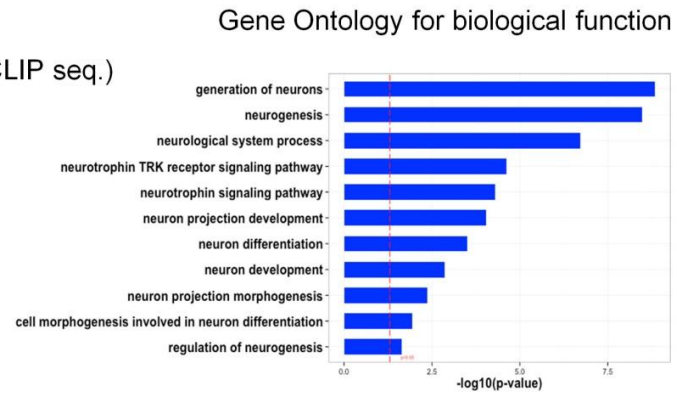**c**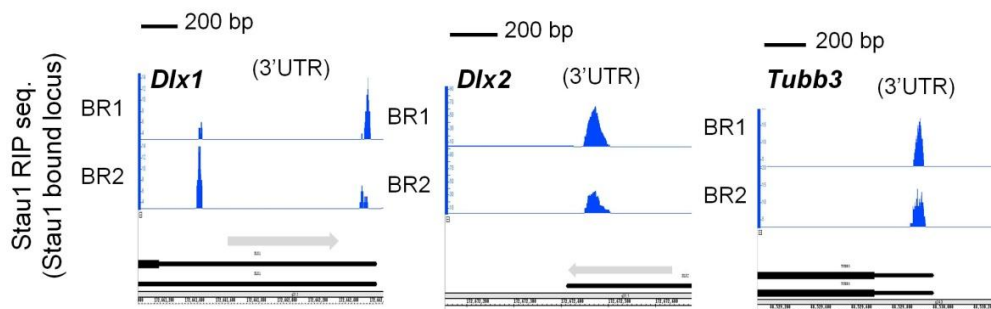

**Supplementary Figure 10. Stau1 specifically binds to neurogenesis-associated mRNAs.** (a) Stau1 hi-CLIP sequencing analysis in HEK293 cells (GSE52447)<sup>1</sup>. Among genes enriched by Stau1, 12.8% are neuro-related genes. (b) Gene ontology (GO) analysis of annotated genes at Stau1 binding sites. (c) Stau1 RIP sequencing analysis<sup>2</sup>. Distribution of Stau1 binding peaks in HEK293 cells. Stau1 protein was highly enriched in 3'UTRs of *Dlx1*, *Dlx2* and *Tubb3* mRNAs.

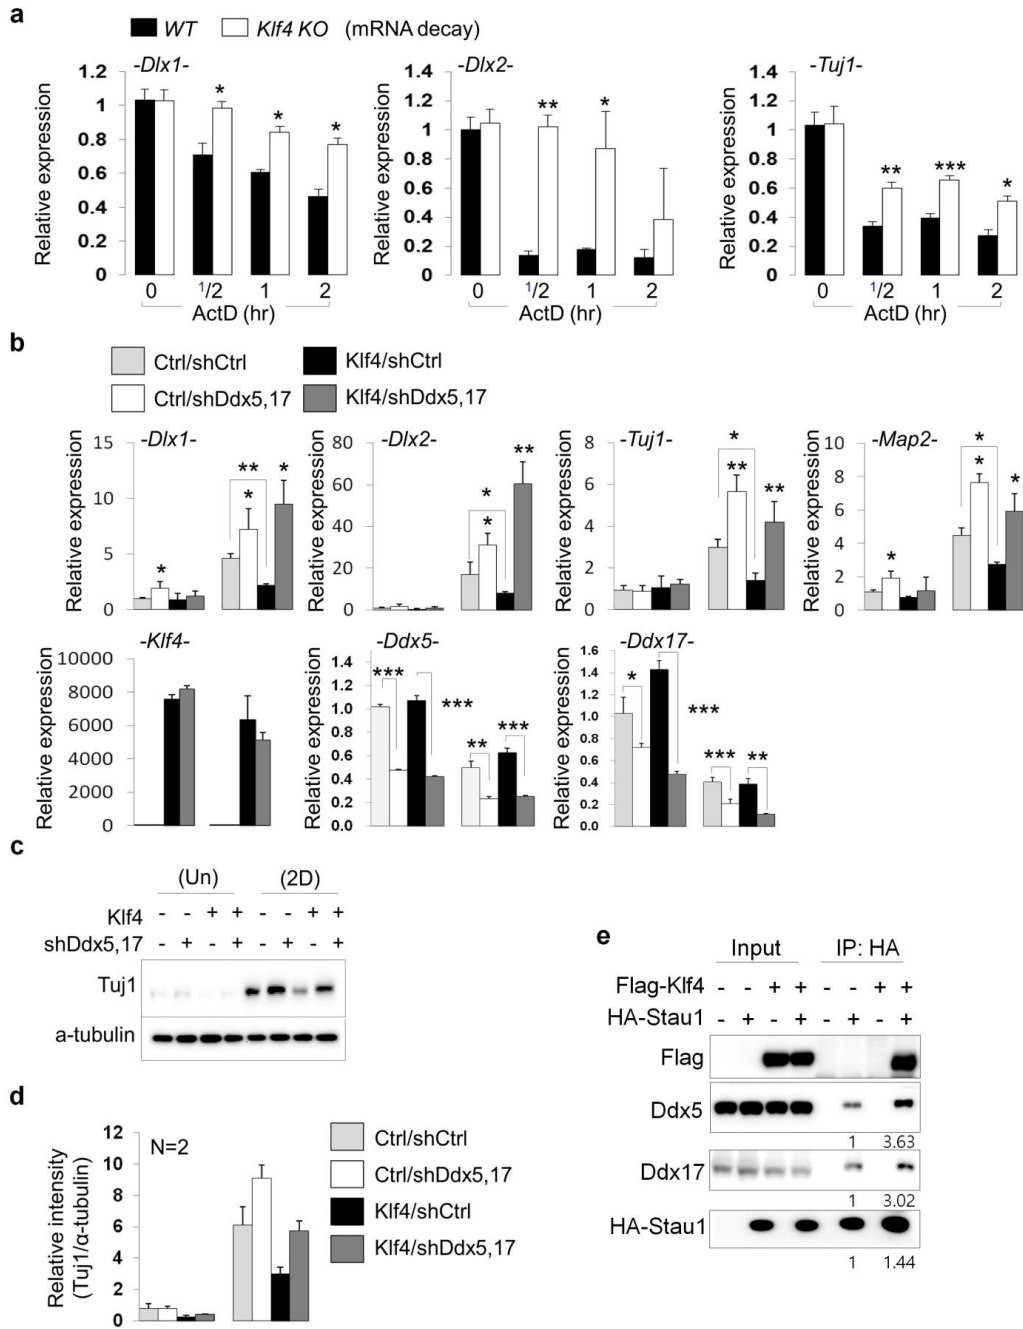

**Supplementary Figure 11. *Klf4* promotes mRNA decay and inhibit neurogenesis by cooperating with *Stau1/Ddx5/17* complex.** (a) Wild-type and *Klf4* cKO NPCs were treated with actinomycin D (5  $\mu$ g/ml) for indicated times and mRNAs were prepared for RNA stability assays (n=3). Values correspond to mean $\pm$ SD. *t*-tests were performed to calculate significance

(\*P < 0.05, \*\*P < 0.005, \*\*\*P < 0.0005). **(b)** RT-qPCR of indicated transcripts in control- or Klf4-overexpressing NPCs infected with pLKO.1 shScramble or pLKO.1 shDdx5/17 lentivirus cultured for 0.2 or 2 days in differentiation conditions (n=3). Values correspond to mean±SD. Anova tests were performed to calculate significance (\*P < 0.01, \*\*P < 0.001, \*\*\*P < 0.0001). **(c)** Immunoblot of indicated antibodies in samples shown in (b) (n=2). See Supplementary Table 4. **(d)** Quantification of (c). **(e)** HEK293T cells were transfected with empty or Flag-Klf4 expression plasmids with control or HA-Stau1 vector. At 24 hours after transfection, lysates were immunoprecipitated with anti-IgG or anti-Mbd3 (n=1) and were analyzed by immunoblotting for indicated proteins. See also Supplementary Fig. 21.

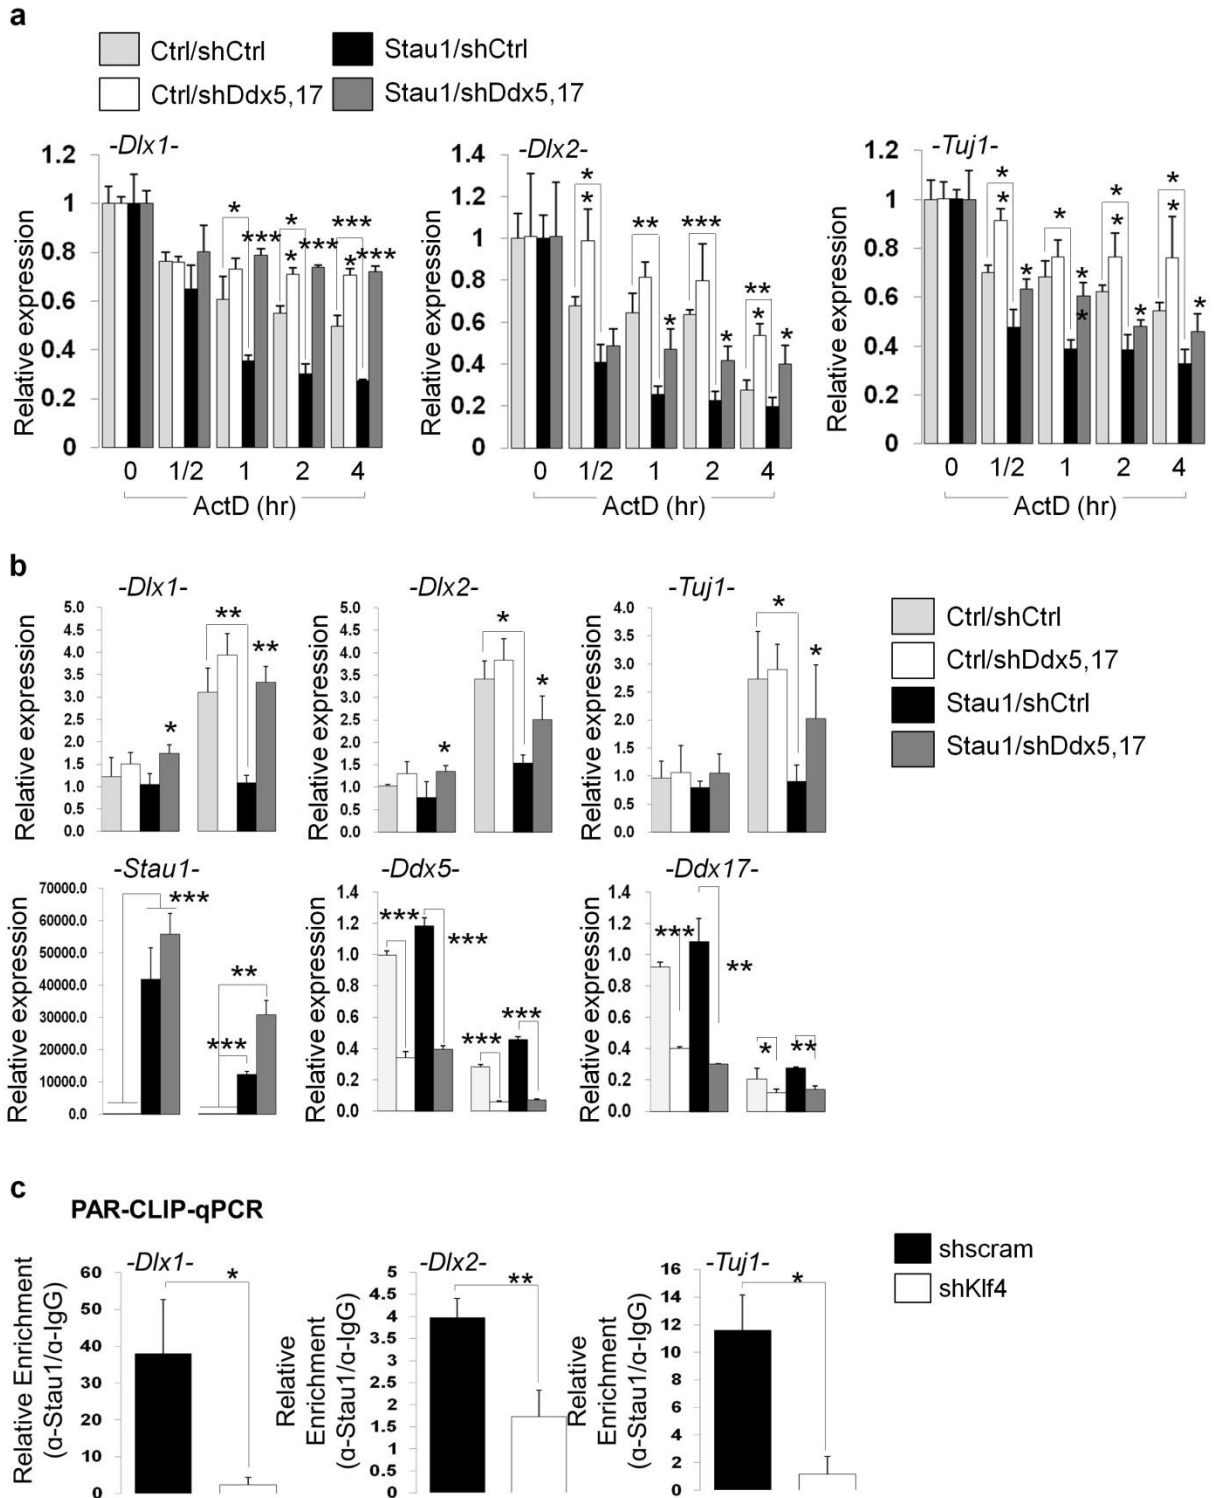

Supplementary Figure 12. Ddx5/17 double stranded RNA helicases are novel components



**for SMD** (a) RT-qPCR to assess the mRNA decay following Stau1 overexpression in NPCs transduced with shScramble or shDdx5/17 knockdown constructs. NPCs were treated with actinomycin D (5  $\mu\text{g/ml}$ ) for indicated times, and mRNAs were prepared for RNA stability assay (n=3). (b) RT-qPCR of indicated transcripts in control- or Stau1-overexpressing NPCs infected with pLKO.1 shScramble or pLKO.1 shDdx5/17 lentivirus cultured for 0.2 or 2 days in differentiation conditions (n=3). (c) PAR-CLIP qPCR to assess Stau1 enrichment on target mRNAs in NPCs transduced with shKif4 knockdown or shScramble constructs. Each values enriched by Stau1 protein were divided by IgG control. Data is presented as mean $\pm$ SD. Anova tests were performed to calculate statistical significance (\*P < 0.01, \*\*P < 0.001, \*\*\*P < 0.0001). See Supplementary Table 4.

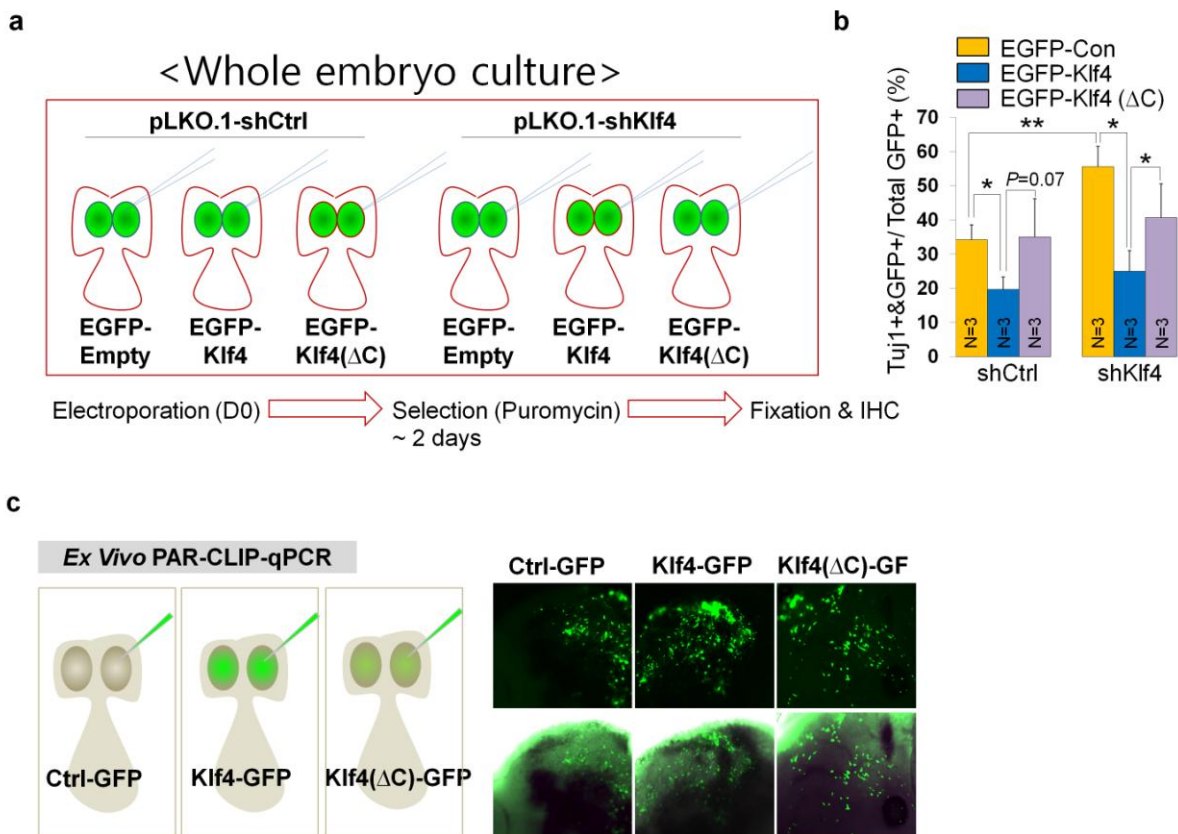

**Supplementary Figure 13. Klf4 inhibits neurogenesis through formation of Klf4/Stau1 complex *ex vivo*.** (a) Schematic of injection site (green) and experimental process for *ex utero* electroporation. pEGFP-Control, pEGFP-Klf4, or pEGFP-ΔC vectors were electroporated in mouse embryonic cortex together with shscramble or shKlf4 lentiviral vectors. (b) The effect of wild-type Klf4 or its mutant (ΔC) overexpression on neurogenesis was evaluated by counting Tuj1/EGFP double positive cells versus total EGFP-positive cells in VZ/SVZ/IMZ/CP compartments (n=3). (c) Schematic of PAR-CLIP-qPCR experiment in cortices electroporated with pEGFP-Control, pEGFP-Klf4, or pEGFP-ΔC constructs and grown in *ex vivo* condition for 2 days (2D).

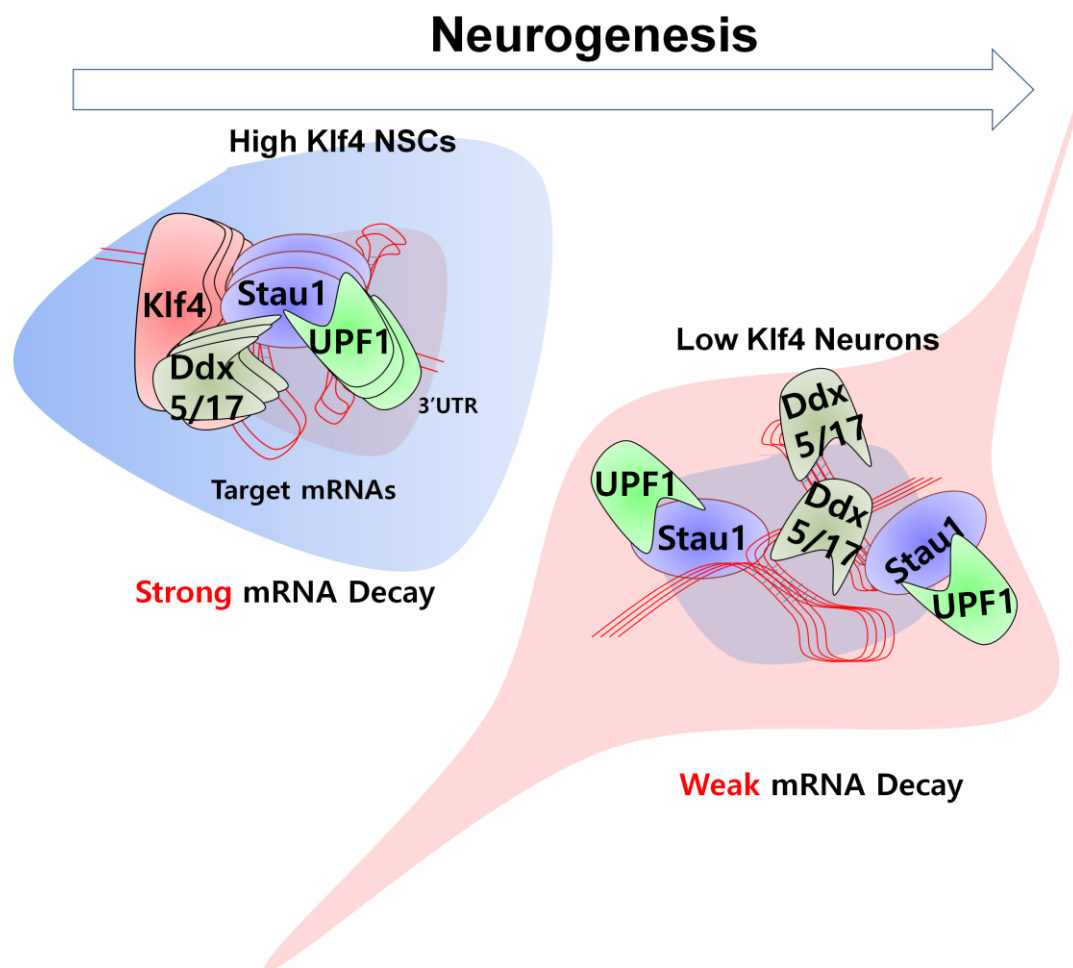

**Supplementary Figure 14. Klf4/Ddx5/17 dependent Stau1 mediated mRNA decay (SMD) regulates cortical neurogenesis.** A model of proposed function of the Klf4-Ddx5/17-Stau1 axis in NPC cell fate determination during neurogenesis.

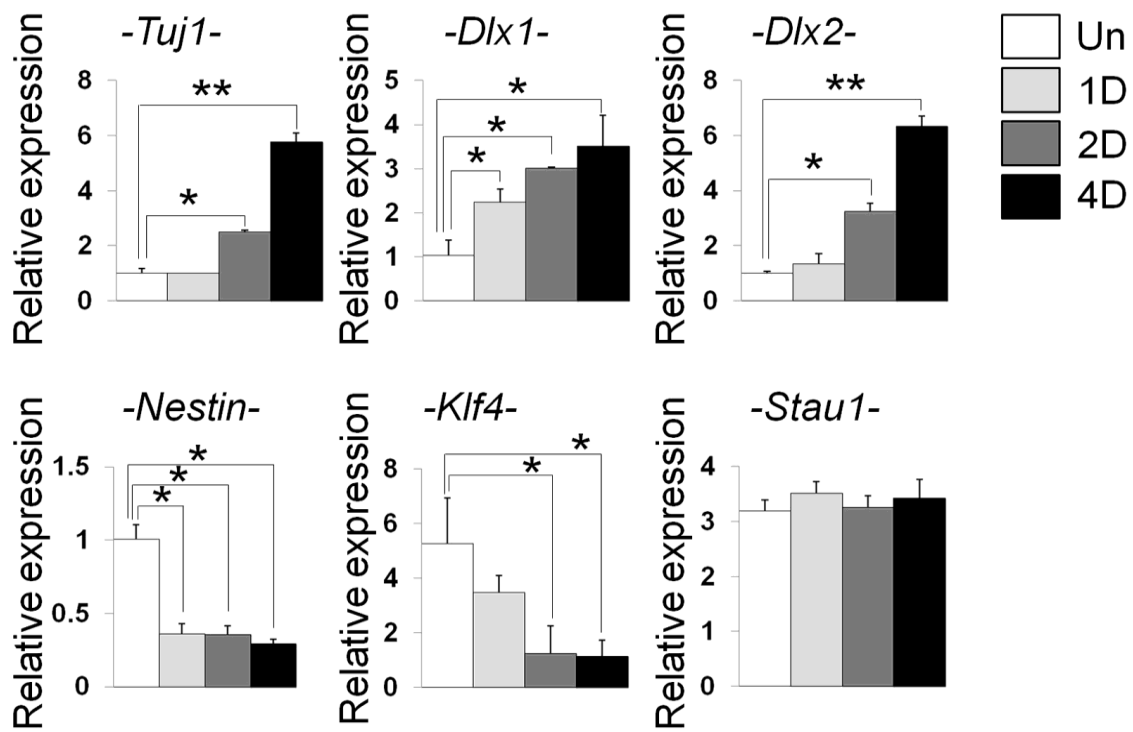

**Supplementary Figure 15. Klf4, but not Stau1, decreases during neural differentiation of NPCs.** qPCR analysis of indicated mRNAs. Values correspond to the mean $\pm$ SD. Diff. (d), days in differentiation. Statistical t-test analysis was performed to calculate significance (\*P < 0.05, \*\*P < 0.005, ns, P > 0.05).

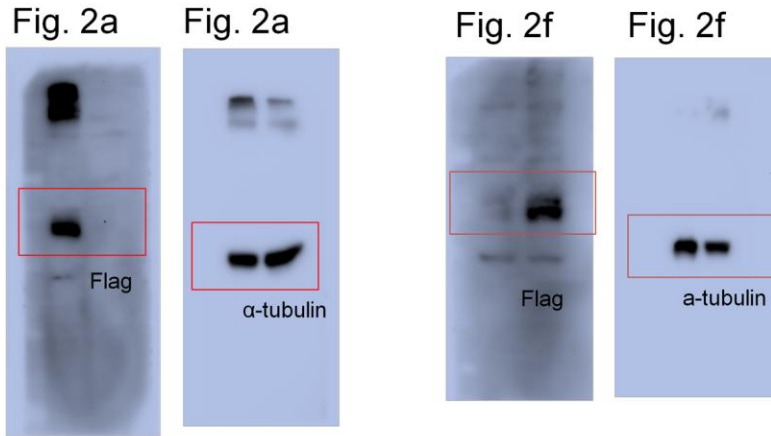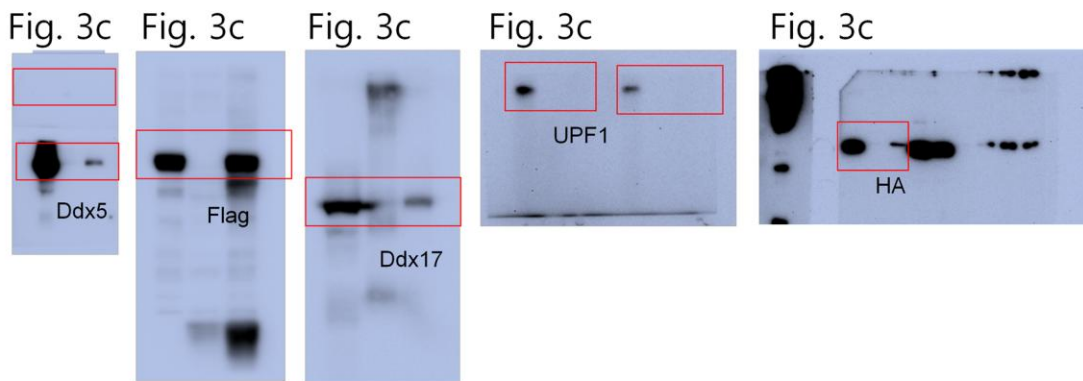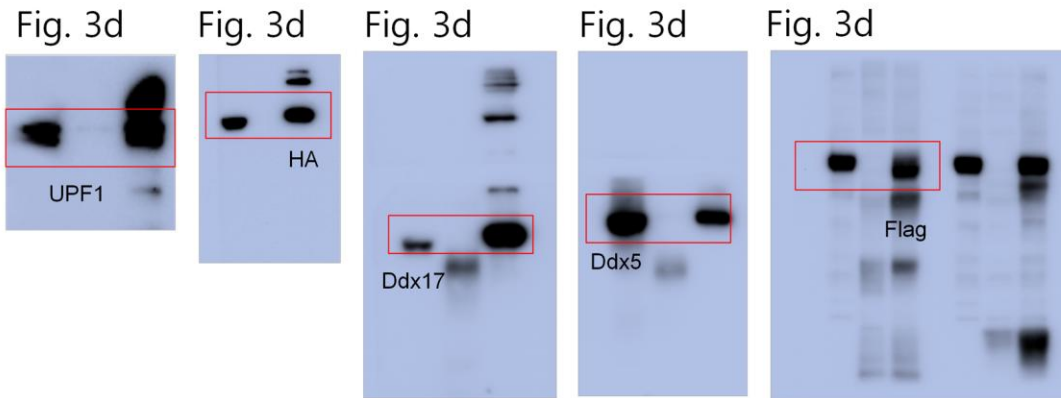

**Supplementary Figure 16. Full blots from main figures.** The full blots used for Figure 2a, f, 3c, d. The specific bands shown in the main figures are indicated by red boxes.

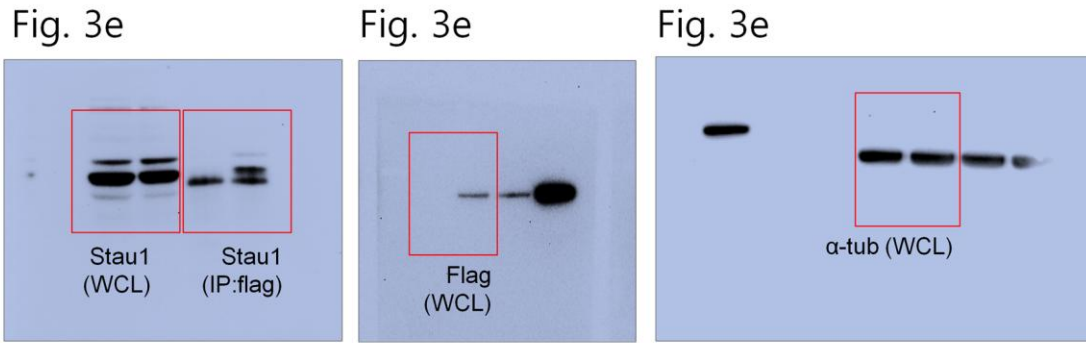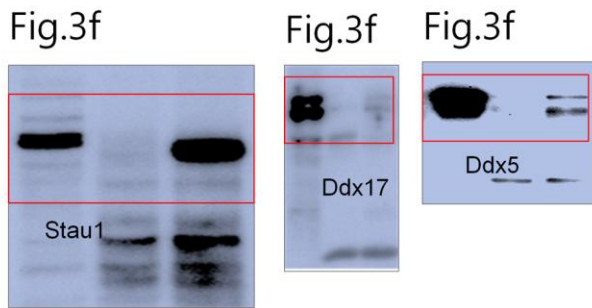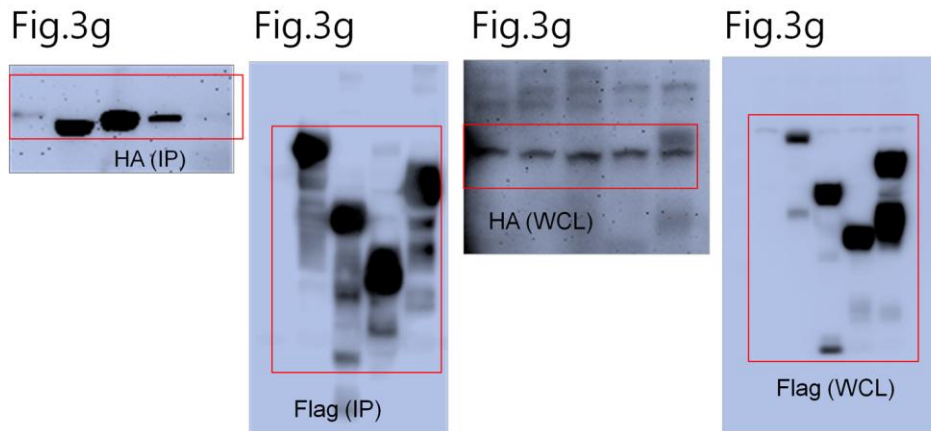

**Supplementary Figure 17. Full blots from main figures.** The full blots used for Figure 3e-g.

The specific bands shown in the main figures are indicated by red boxes.

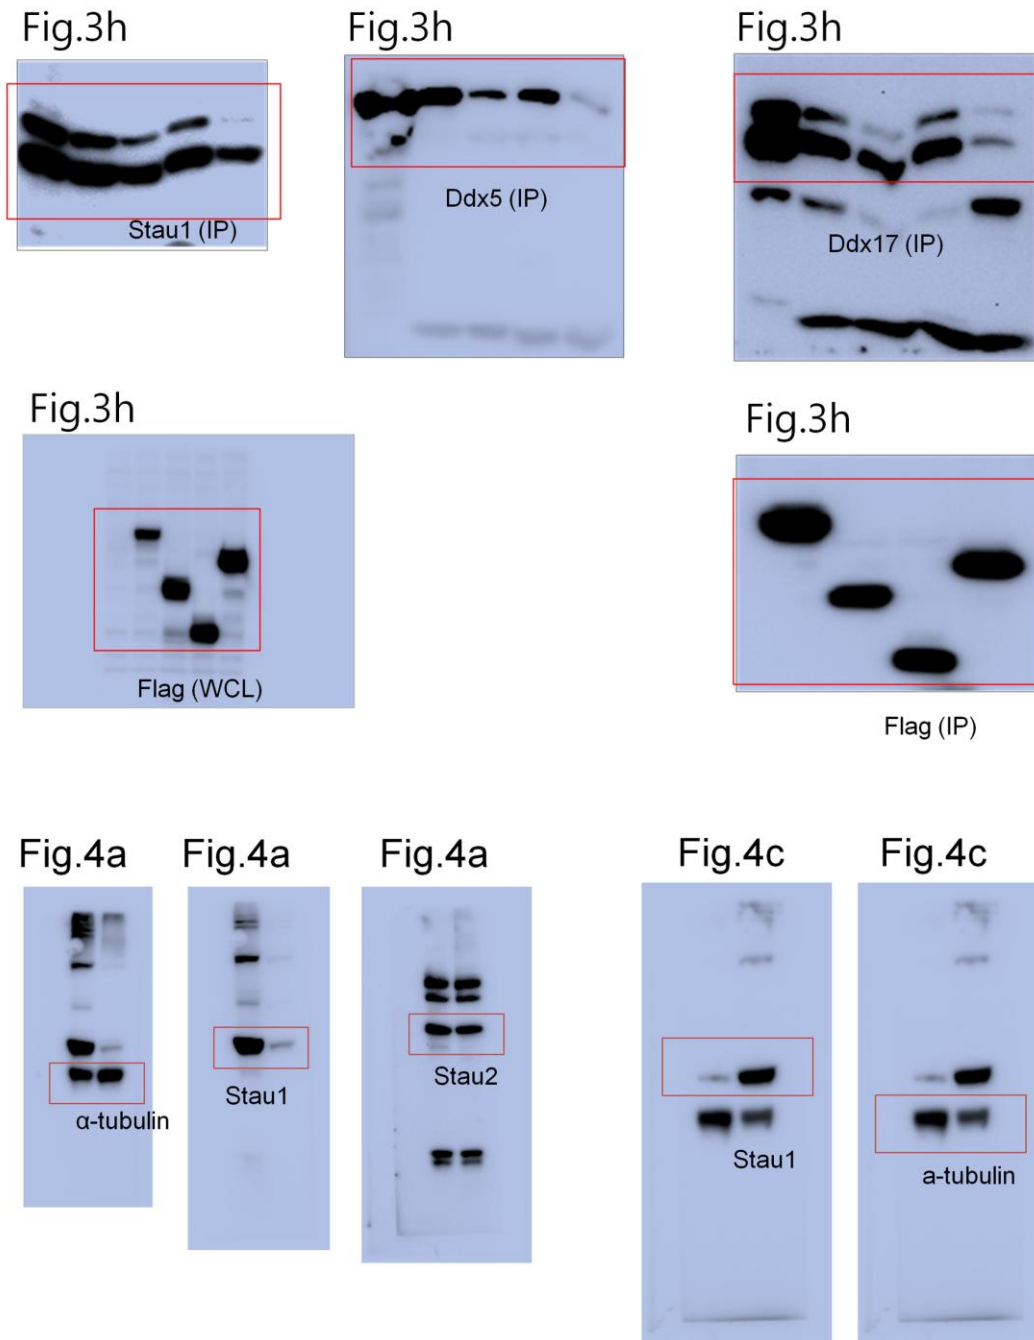

**Supplementary Figure 18. Full blots from main figures.** The full blots used for Figure 3h, 4a, c. The specific bands shown in the main figures are indicated by red boxes.

Fig. S7a

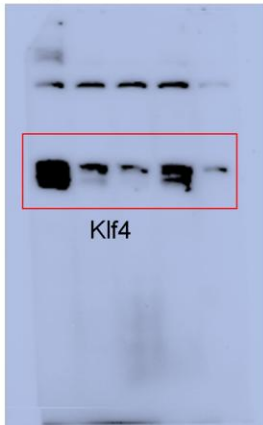

Fig. S7a

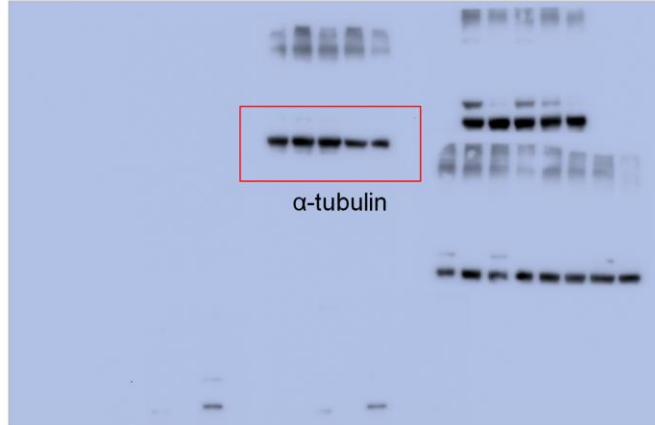

Fig. S7f

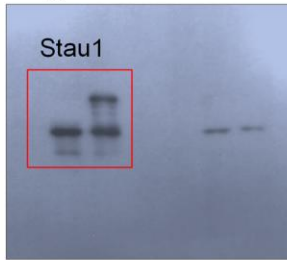

Fig. S7f

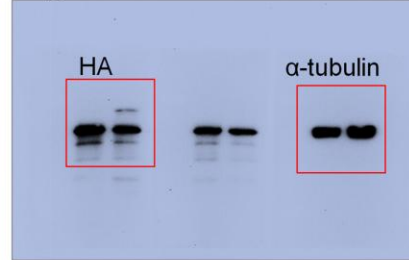

Fig. S7f

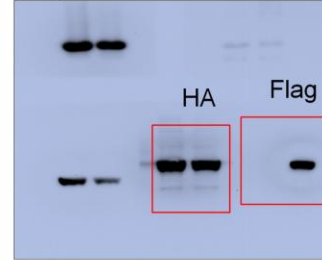

Fig. S7g

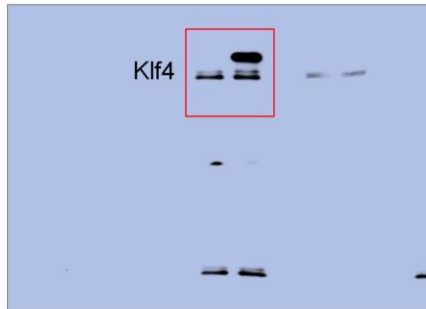

Fig. S7g

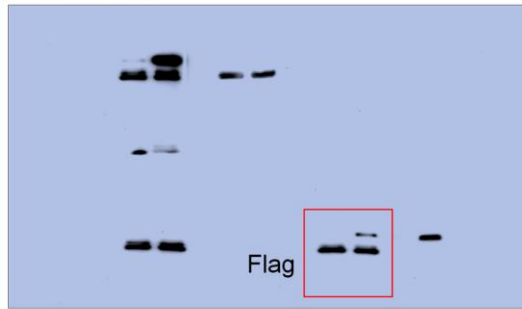

Fig. S7g

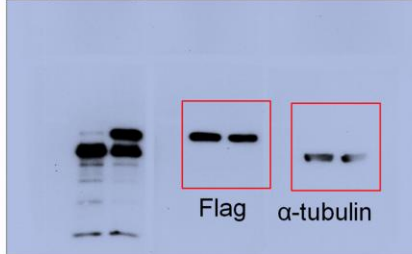

Fig. S7g

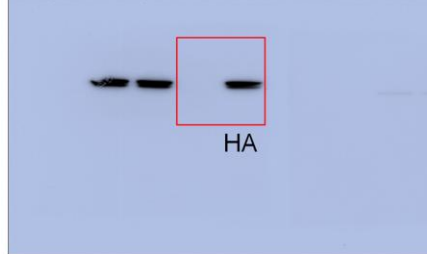

**Supplementary Figure 19. Full blots from main figures.** The full blots used for Supplementary Figure 7a, f, g. The specific bands shown in the main figures are indicated by red boxes.

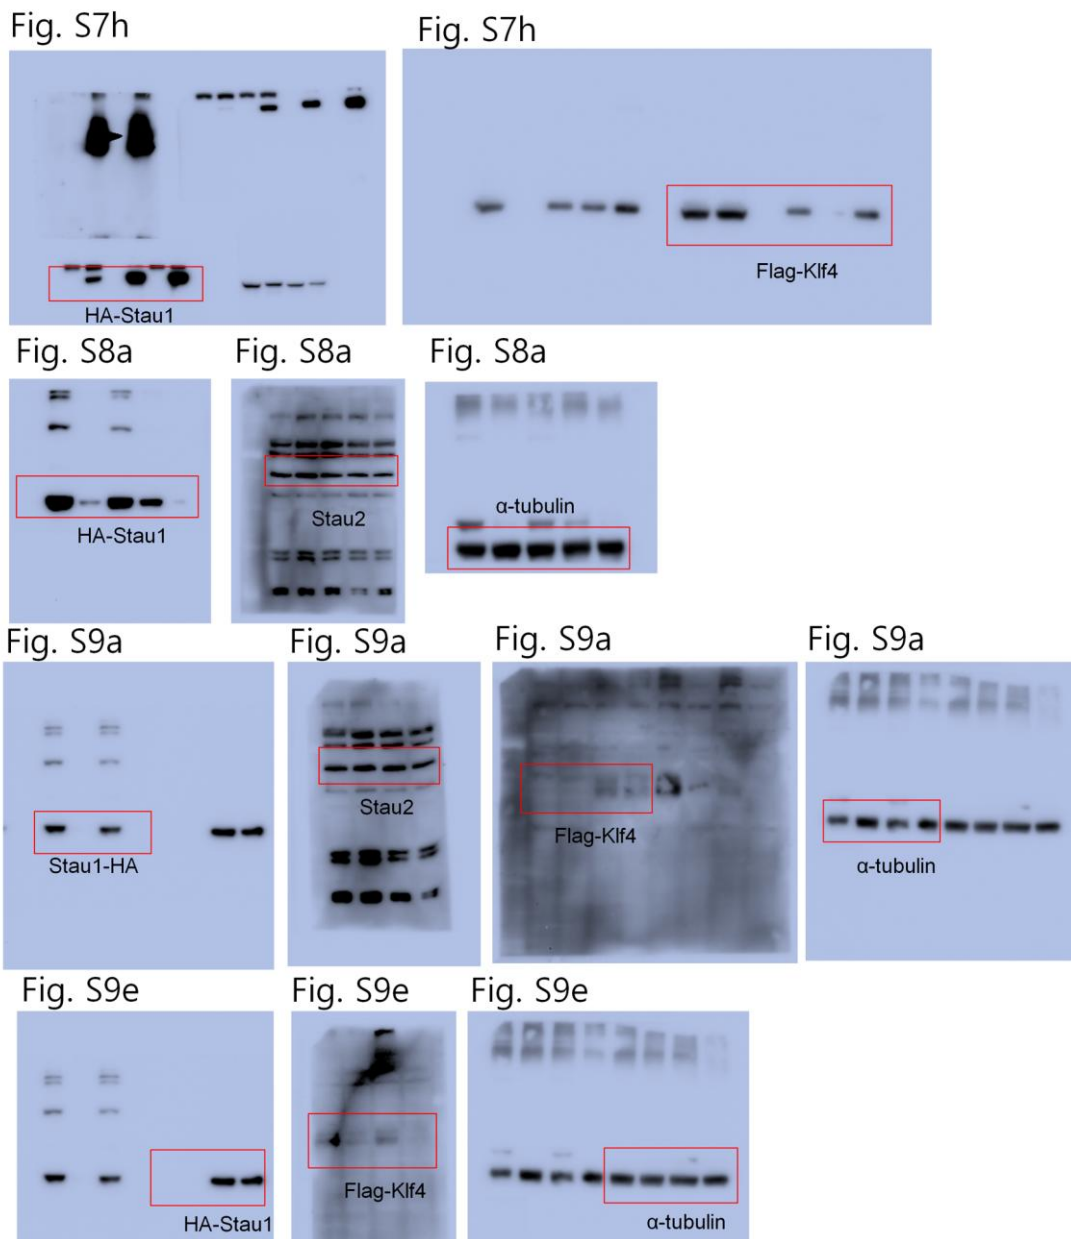

**Supplementary Figure 20. Full blots from main figures.** The full blots used for Supplementary Figure 7h, 8a, 9a, e. The specific bands shown in the main figures are indicated by red boxes.



Fig. S11c

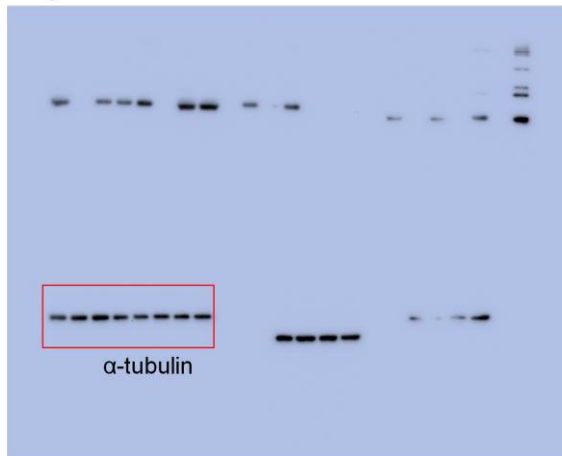

Fig. S11c

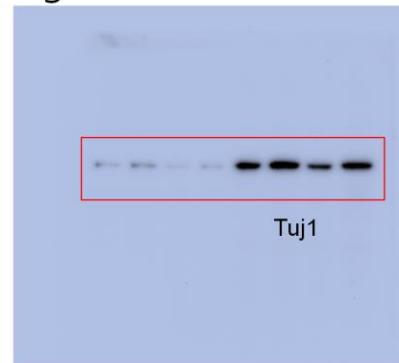

Fig. S11e

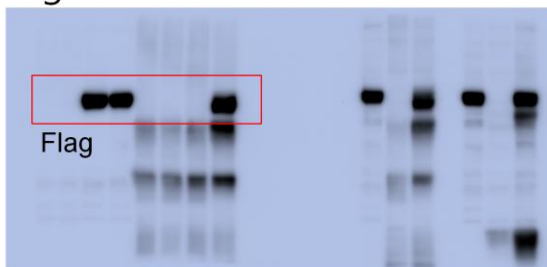

Fig. S11e

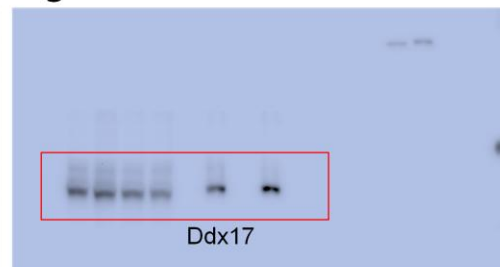

Fig. S11e

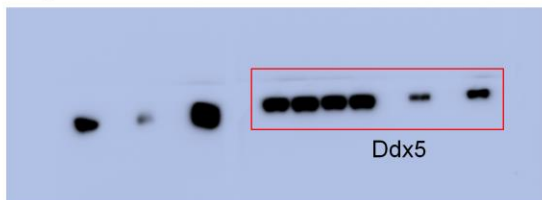

Fig. S11e

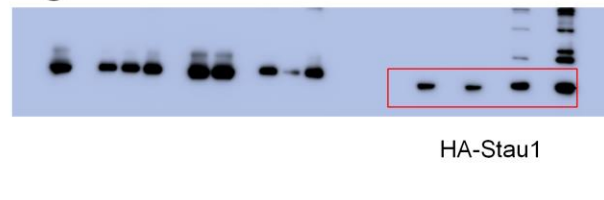

**Supplementary Figure 21. Full blots from main figures.** The full blots used for Supplementary Figure 11c, e. The specific bands shown in the main figures are indicated by red boxes.

### Supplementary Table 1. Construction of pLKO3G shRNA and target sequences.

To knock down Klf4 and Stau1 expression in NSCs we generated pLKO.3G short hairpin (sh)RNA lentiviral vector system. Target sequences of Klf4 and Stau1 were chosen using RNAi consortium shRNA library (<http://www.broadinstitute.org/rnai/public/>) (three clones targeting different sequences in the three coding regions of Klf4 and Stau1 gene) against Klf4 and Stau1. To generate oligos for cloning, sense and antisense sequences of chosen target sequences were ordered from IDT. Sequence-verified shRNA lentiviral plasmid vectors for mouse Klf4 and Stau1 gene were cloned into the pLKO.3G vector and knockdown efficiency were measured by western blot (see Supplementary Fig. 7a).

For gene transfections we utilized Lipofectamine 3000 and Amaxa nucleofection (Lonza, <http://www.lonzabio.com/cell-biology/transfection/>) for the transfection of mouse NSCs. A range of knockdown efficiencies was observed. The shKlf4 (#1, #2 and #3) clones showed maximum efficiencies and three vectors were used for further experiments (see Fig. 2a). For shStau1 knockdown experiment, Two (we encoded it as shStau1 #1 and #3) out of three clones appeared to be efficiently knocking down Stau1 expression in NSCs (see Fig. 4a and Supplementary Fig. 8a) and both were used for further experiments. For shControl transfection, sequences were chosen based on Sigma-Aldrich shRNA products which had been previously validated as a non-target shRNA control. The plasmids containing the below sequences that does not target any gene, making it useful as a negative control in our experiments and appear no change Klf4 or Stau1 expression (see Supplementary Fig. 7a and 8a).

| Gene            | shKlf4 #1                                                     | Target region |
|-----------------|---------------------------------------------------------------|---------------|
| Target sequence | CATGTTCTAACAGCCTAAATG                                         | 3' UTR        |
| Ordered oligo   | AATTCATGTTCTAACAGCCTAAATGCTCGAGCATTTAGGCTGTTAGAACATGTTTTTTAT  |               |
| Gene            | shKlf4 #2                                                     |               |
| Target sequence | TTGTGGATATCAGGGTATAAA                                         | 3' UTR        |
| Ordered oligo   | AATTTTGTGGATATCAGGGTATAAACTCGAGTTTATACCCTGATATCCACAATTTTTTTAT |               |
| Gene            | shKlf4 #3                                                     |               |
| Target sequence | CTCTCTCACATGAAGCGACTT                                         | CDS           |
| Ordered oligo   | AATTCCTCTCACATGAAGCGACTTCTCGAGAAGTCGCTTCATGTGAGAGAGTTTTTTAT   |               |
| Gene            | shStau1 #1                                                    |               |
| Target sequence | ATTGCGCTGAAGCGGAATTTG                                         | CDS           |
| Ordered oligo   | AATTATTGCGCTGAAGCGGAATTTGCTCGAGCAAATTCGCTTCAGCGCAATTTTTTTAT   |               |
| Gene            | shStau1 #2                                                    |               |
| Target sequence | GCCAAGGGATGAATCCTATTA                                         | CDS           |
| Ordered oligo   | AATTGCCAAGGGATGAATCCTATTACTCGAGTAATAGGATTCATCCCTTGGCTTTTTTTAT |               |
| Gene            | shStau1 #3                                                    |               |
| Target sequence | CCAGGGATTCCAGGTTGAATA                                         | CDS           |
| Ordered oligo   | AATTCAGGGATTCCAGGTTGAATACTCGAGTATTCAACCTGGAATCCCTGGTTTTTTAT   |               |

**Supplementary Table 2. Primer sequences used for quantitative or RT-PCR analysis.**

| <b>Genes</b>    | <b>Primer Sequences</b>        | <b>Tm (°C)</b> |
|-----------------|--------------------------------|----------------|
| <i>Nestin</i>   | 5'-CCCTGAAGTCGAGGAGCTG-3'      | 57.4           |
|                 | 5'-CTGCTGCACCTCTAAGCGA-3'      | 57.3           |
| <i>Dlx1</i>     | 5'-ATGCCAGAAAGTCTCAACAGC-3'    | 60.6           |
|                 | 5'-AACAGTGCATGGAGTAGTGCC-3'    | 62.4           |
| <i>Dlx2</i>     | 5'-AAAGAAAGTCCGGAACACG-3'      | 60.1           |
|                 | 5'-TCTTCTTGAACCTGCATCGGC-3'    | 60.5           |
| <i>Tuj1</i>     | 5'-TAGACCCCAGCGGCAACTAT-3'     | 58.2           |
|                 | 5'-GTTCCAGGTTCCAAGTCCACC-3'    | 58.0           |
| <i>Gad67</i>    | 5'-GCCACAAACTCAGCGGCATAGAAA-3' | 60.0           |
|                 | 5'-AGACGTCATACTGCTTGTCTGGCT-3' | 60.0           |
| <i>NeuN</i>     | 5'-GAAACCGCAAGCCCTCATTTTC-3'   | 60.1           |
|                 | 5'-TTGGATGCCTCTTGGTTTGGT-3'    | 60             |
| <i>Pitx3</i>    | 5'-TGCGCTGTCGTTATCGGAC-3'      | 62.4           |
|                 | 5'-GGTAGCGATTCTCTGGAAGG-3'     | 61.7           |
| <i>Pax6</i>     | 5'-AACCCACGCAAGATGGCTG-3'      | 62.9           |
|                 | 5'-GCATCCCAGTGCATAAAAACCA-3'   | 61.4           |
| <i>Dat</i>      | 5'-AAATGCTCCGTGGGACCAATG-3'    | 63             |
|                 | 5'-GTCTCCCGCTCTTGAACCTC-3'     | 61.9           |
| <i>Lmx1a</i>    | 5'-ACGGCCTGAAGATGGAGGA-3'      | 62.3           |
|                 | 5'-CAGAAACCTGTCCGAGATGAC-3'    | 60.1           |
| <i>Foxa2</i>    | 5'-CCCTACGCCAACATGAACTCG-3'    | 63             |
|                 | 5'-GTTCTGCCGGTAGAAAGGGA-3'     | 61.2           |
| <i>En1</i>      | 5'-CTAAGGCCCGATTTTCGGTTG-3'    | 60.8           |
|                 | 5'-GAGTGAACGGGTCTCTACCT-3'     | 62.4           |
| <i>Klf4</i>     | 5'-GTGCCCCGACTAACCGTTG-3'      | 63             |
|                 | 5'-GTCGTTGAACTCCTCGGTCT-3'     | 61.2           |
| <i>Staufen1</i> | 5'-GGACCCTCACTCTCGGATG-3'      | 60.8           |
|                 | 5'-TTCTGGCAGGGTTCACTCT-3'      | 62.7           |
| <i>Staufen2</i> | 5'-AGTGACCTCTGGCACAACCTCT-3'   | 62.8           |
|                 | 5'-TGGCTTCAGCAGTAGGAGATG-3'    | 61.3           |
| <i>Gapdh</i>    | 5'-AGGTCGGTGTGAACGGATTTG-3'    | 57.6           |
|                 | 5'-TGTAGACCATGTAGTTGAGGTCA-3'  | 55.1           |

*Gapdh* : Glyceraldehyde-3-phosphate dehydrogenase

**Supplementary Table 3. Primer sequences used for mRNA decay and PAR-CLIP qPCR analysis.**

| Gene            | Sequence               | Tm (°C) | GC (%) |
|-----------------|------------------------|---------|--------|
| mTuj1-CLIP(1-F) | AGTTGCTCGCAGCTGGGGTGT  | 58.2    | 55     |
| mTuj1-CLIP(1-R) | AAAGCTGGGGGCAGTGTC     | 59.7    | 57.9   |
| mTuj1-CLIP(2-F) | CTTCTCACCAGCTCATTAGG   | 52.5    | 50     |
| mTuj1-CLIP(2-R) | ACAGAGGTGGCTAAAATGGG   | 54.9    | 50     |
| mTuj1-CLIP(3-F) | CCCATTTTAGCCACCTCTGT   | 54.9    | 50     |
| mTuj1-CLIP(3-R) | CTGACAGACAGCAGTAAC     | 50      | 50     |
| mDlx1-CLIP(1-F) | GGTATCAGTTCGCACTCAC    | 53.4    | 50     |
| mDlx1-CLIP(1-R) | AAGCCCTCTGCCTTCACTGTT  | 54      | 52     |
| mDlx1-CLIP(2-F) | TGCTTCTCGGAGCCCCTAAAA  | 58.6    | 52.4   |
| mDlx1-CLIP(2-R) | AAGATGAGAGTCTGGTCCGG   | 55.7    | 55     |
| mDlx1-CLIP(3-F) | CCGGACCAGACTTCTCATCTT  | 56      | 55     |
| mDlx1-CLIP(3-R) | GGTCGTAGAATGAGGACAGC   | 55      | 55     |
| mDlx1-CLIP(4-F) | CTCCAAAAAGTCACCAGGTCTG | 55.7    | 50     |
| mDlx1-CLIP(4-R) | TCAGCGTCAGATGAAGTCTG   | 54.3    | 50     |
| mDlx1-CLIP(5-F) | CAGACTTCATCTGACGCTGA   | 54.3    | 50     |
| mDlx1-CLIP(5-R) | ACTTTCCTGTCCTTGTTCCT   | 54.7    | 50     |
| mDlx1-CLIP(6-F) | GGAACAAGGACAGGAAAG     | 50.3    | 50     |
| mDlx1-CLIP(6-R) | CCAGGTGTTCTTGTCCAAACG  | 56.4    | 52.4   |
| mDlx1-CLIP(7-F) | GAACACCTGGCCAAGAAG     | 53.5    | 55.6   |
| mDlx1-CLIP(7-R) | GCCGCTGCTTGTGTCTTACT   | 58      | 55     |
| mDlx1-CLIP(8-F) | TCGACCACAGAACAACAAGTC  | 54.7    | 50     |
| mDlx1-CLIP(8-R) | TCGGGTTTACAGCCACACAC   | 57.7    | 55     |
| mDlx1-CLIP(9-F) | GTGTGTGGCTGTAAACCCGA   | 57.7    | 55     |
| mDlx1-CLIP(9-R) | CTTATTTACAAAGTTCGCCCC  | 54.3    | 45.5   |
| mDlx2-CLIP(1-F) | TCGAGTGGACAGCGTCTGA    | 57.9    | 58.2   |
| mDlx2-CLIP(1-R) | AGAAGTGGCTCCACGAC      | 54.5    | 58.8   |
| mDlx2-CLIP(2-F) | GTCGTGGAGCCACTTCT      | 54.5    | 58.8   |
| mDlx2-CLIP(2-R) | ACCCTGAGGATCACGCTGA    | 58.3    | 57.9   |
| mDlx2-CLIP(3-F) | TCAGCGTGATCCTCAGGGT    | 58.3    | 57.9   |
| mDlx2-CLIP(3-R) | TGGAGTAGGACCCAGGAG     | 55.3    | 61.1   |
| mDlx2-CLIP(4-F) | ACCTCCTGGGTCTACTCCA    | 59.6    | 60     |
| mDlx2-CLIP(4-R) | GGTCATCCGCAAAGGCACCTA  | 59.8    | 57.1   |
| mDlx2-CLIP(5-F) | TAGGTGCCTTTGCGGATGACC  | 59.8    | 57.1   |
| mDlx2-CLIP(5-R) | GGGAAATCTGCACAGACACC   | 53.6    | 52.6   |
| mDlx2-CLIP(6-F) | GGTGTCTGTGCAGATTTCCCC  | 58.3    | 57.1   |

mDlx2-CLIP(6-R)

ATAGGGACTGCTGAGGTCCTG

58.2

54.5

m*Tuj1*-CLIP

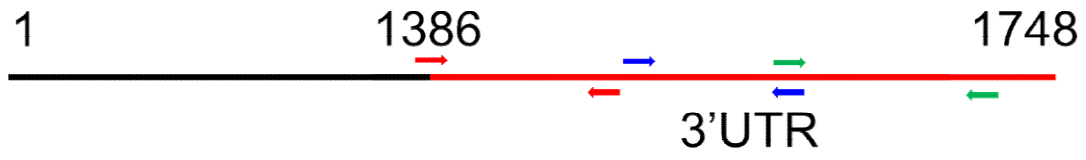

m*Dlx1*-CLIP

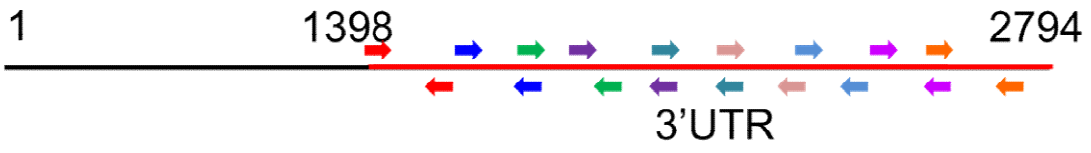

m*Dlx2*-CLIP

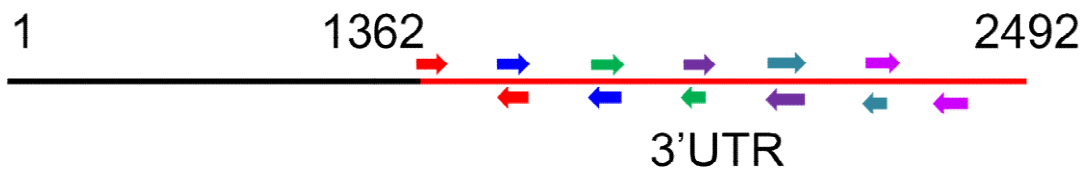

# Supplementary Table 4. Values and parameters for the statistical comparisons shown in main and supplementary figures

Fig.1F

| <b>Klf6 gene</b>             | Table Analyzed | Date 1 | <b>Dlx7 gene</b>             | Table Analyzed            | Date 1           | <b>Dlx2 gene</b>             | Table Analyzed | Date 1                    |             |         |                  |
|------------------------------|----------------|--------|------------------------------|---------------------------|------------------|------------------------------|----------------|---------------------------|-------------|---------|------------------|
| One-way analysis of variance |                |        | One-way analysis of variance |                           |                  | One-way analysis of variance |                |                           |             |         |                  |
| P value                      | < 0.0001       |        | P value                      | < 0.0002                  |                  | P value                      | < 0.0001       |                           |             |         |                  |
| P value summary              | ***            |        | P value summary              | ***                       |                  | P value summary              | ***            |                           |             |         |                  |
| Are means signif. different  | Yes            |        | Are means signif. different  | Yes                       |                  | Are means signif. different  | Yes            |                           |             |         |                  |
| Number of groups             | 4              |        | Number of groups             | 4                         |                  | Number of groups             | 4              |                           |             |         |                  |
| F                            | 39.81          |        | F                            | 24.67                     |                  | F                            | 130.1          |                           |             |         |                  |
| R squared                    | 0.9372         |        | R squared                    | 0.9024                    |                  | R squared                    | 0.9799         |                           |             |         |                  |
| ANOVA Table                  |                |        | ANOVA Table                  |                           |                  | ANOVA Table                  |                |                           |             |         |                  |
| SS                           |                | df     | MS                           |                           |                  | SS                           |                | df                        | MS          |         |                  |
| Treatment (between colu)     | 45.17          | 3      | 15.06                        | Treatment (between colu)  | 4184             | 3                            | 1395           | Treatment (between colu)  | 42130       | 3       | 14040            |
| Residual (within columns)    | 3.020          | 3      | 0.3783                       | Residual (within columns) | 452.3            | 8                            | 56.53          | Residual (within columns) | 863.7       | 8       | 108              |
| Total                        | 48.2           | 11     |                              | Total                     | 4636             | 11                           |                | Total                     | 42993       | 11      |                  |
| Tukey's Multiple Comparison  | Mean Diff.     | q      | Significant                  | Summary                   | 95% CI of diff.  | Tukey's Multiple Comparison  | Mean Diff.     | q                         | Significant | Summary | 95% CI of diff.  |
| WT-Uh vs cKO-Uh              | 4.103          | 11.59  | Yes                          | ***                       | 2.498 to 5.714   | WT-Uh vs cKO-Uh              | -12.27         | 2.936                     | No          | ns      | -32.41 to 6.913  |
| WT-Uh vs WT-ZDV              | 0.7079         | 1.991  | No                           | ns                        | -0.9003 to 2.316 | WT-Uh vs WT-ZDV              | -8.86          | 2.04                      | No          | ns      | -28.52 to 10.80  |
| WT-Uh vs cKO-ZDV             | 4.281          | 12.09  | Yes                          | ***                       | 2.665 to 5.902   | WT-Uh vs cKO-ZDV             | -48.96         | 11.26                     | Yes         | ***     | -68.64 to -29.32 |
| cKO-Uh vs WT-ZDV             | -3.389         | 9.569  | Yes                          | ***                       | -5.690 to -1.700 | cKO-Uh vs WT-ZDV             | 3.881          | 0.8892                    | No          | ns      | -15.77 to 23.55  |
| cKO-Uh vs cKO-ZDV            | -0.8737        | 0.5209 | No                           | ns                        | -1.420 to -0.776 | cKO-Uh vs cKO-ZDV            | 38.52          | 8.342                     | Yes         | **      | 40.96 to -16.57  |
| WT-ZDV vs cKO-ZDV            | 3.865          | 10.1   | Yes                          | ***                       | 1.978 to 5.194   | WT-ZDV vs cKO-ZDV            | -40.12         | 9.245                     | Yes         | ***     | -59.78 to -20.46 |

Fig.4E

| <b>Dlx7 gene</b>             | Table Analyzed | Date 1 | <b>Sox9 gene</b>             | Table Analyzed            | Date 1            | <b>Sox9 gene</b>             | Table Analyzed | Date 1                    |             |         |                   |
|------------------------------|----------------|--------|------------------------------|---------------------------|-------------------|------------------------------|----------------|---------------------------|-------------|---------|-------------------|
| One-way analysis of variance |                |        | One-way analysis of variance |                           |                   | One-way analysis of variance |                |                           |             |         |                   |
| P value                      | < 0.0001       |        | P value                      | < 0.0001                  |                   | P value                      | < 0.0001       |                           |             |         |                   |
| P value summary              | ***            |        | P value summary              | ***                       |                   | P value summary              | ***            |                           |             |         |                   |
| Are means signif. different  | Yes            |        | Are means signif. different  | Yes                       |                   | Are means signif. different  | Yes            |                           |             |         |                   |
| Number of groups             | 4              |        | Number of groups             | 4                         |                   | Number of groups             | 4              |                           |             |         |                   |
| F                            | 56.15          |        | F                            | 270                       |                   | F                            | 66.2           |                           |             |         |                   |
| R squared                    | 0.9547         |        | R squared                    | 0.9902                    |                   | R squared                    | 0.9613         |                           |             |         |                   |
| ANOVA Table                  |                |        | ANOVA Table                  |                           |                   | ANOVA Table                  |                |                           |             |         |                   |
| SS                           |                | df     | MS                           | SS                        |                   | df                           | MS             |                           |             |         |                   |
| Treatment (between colu)     | 12.43          | 3      | 4.142                        | Treatment (between colu)  | 2229              | 3                            | 743.1          | Treatment (between colu)  | 25.2        | 3       | 8.601             |
| Residual (within columns)    | 0.93           | 3      | 0.307375                     | Residual (within columns) | 220.2             | 8                            | 27.52          | Residual (within columns) | 1.039       | 8       | 0.1299            |
| Total                        | 13.37          | 11     |                              | Total                     | 2251.2            | 11                           |                | Total                     | 26.84       | 11      |                   |
| Tukey's Multiple Comparison  | Mean Diff.     | q      | Significant                  | Summary                   | 95% CI of diff.   | Tukey's Multiple Comparison  | Mean Diff.     | q                         | Significant | Summary | 95% CI of diff.   |
| WT-Uh vs cKO-Uh              | 1.373          | 3.75   | No                           | ns                        | -0.8028 to 3.4965 | WT-Uh vs cKO-Uh              | -0.7716        | 3.707                     | No          | ns      | -1.714 to 0.1710  |
| WT-Uh vs WT-ZDV              | -0.6963        | 4.433  | No                           | *                         | -1.406 to 0.01424 | WT-Uh vs WT-ZDV              | -2.136         | 10.26                     | Yes         | ***     | -3.079 to -1.914  |
| WT-Uh vs cKO-ZDV             | -2.581         | 16.45  | Yes                          | ***                       | -3.291 to -1.871  | WT-Uh vs cKO-ZDV             | -3.859         | 18.54                     | Yes         | ***     | -4.801 to -2.918  |
| cKO-Uh vs WT-ZDV             | -0.4802        | 3.063  | No                           | ns                        | -1.190 to 0.2299  | cKO-Uh vs WT-ZDV             | -1.366         | 6.957                     | Yes         | **      | -2.307 to -0.4221 |
| cKO-Uh vs cKO-ZDV            | -2.365         | 10.09  | Yes                          | ***                       | -3.075 to -1.655  | cKO-Uh vs cKO-ZDV            | -3.097         | 14.83                     | Yes         | ***     | -4.030 to -2.144  |
| WT-ZDV vs cKO-ZDV            | -1.885         | 12.69  | Yes                          | ***                       | -2.695 to -1.075  | WT-ZDV vs cKO-ZDV            | -1.722         | 8.276                     | Yes         | **      | -2.666 to -0.7798 |

Fig. 4F



Figure 68

| One way Anova test (Tukey's multiple comparison test) |                  |          |                        |         |                |                     |  |  |  |
|-------------------------------------------------------|------------------|----------|------------------------|---------|----------------|---------------------|--|--|--|
| <b>0101</b>                                           | Site Analyzed    | 01       |                        |         |                |                     |  |  |  |
| One-way analysis of variance                          |                  |          |                        |         |                |                     |  |  |  |
| F value                                               | 0.036            |          |                        |         |                |                     |  |  |  |
| F value summary                                       | ---              |          |                        |         |                |                     |  |  |  |
| Are means equal (default) (P < 0.05)                  | Yes              |          |                        |         |                |                     |  |  |  |
| Number of groups                                      | 4                |          |                        |         |                |                     |  |  |  |
| F                                                     | 0.0082           |          |                        |         |                |                     |  |  |  |
| R squared                                             | 0.0009           |          |                        |         |                |                     |  |  |  |
| ANOVA Table                                           | SS               | df       | MS                     |         |                |                     |  |  |  |
| Treatment (between columns)                           | 0.00129          | 3        | 0.00043                |         |                |                     |  |  |  |
| Residual (within columns)                             | 0.226            | 8        | 0.02825                |         |                |                     |  |  |  |
| Total                                                 | 0.2341           | 11       |                        |         |                |                     |  |  |  |
| <b>Tukey's Multiple Comparison Test</b>               | Mean Diff.       | q        | Significant? P < 0.05? | Summary | 95% CI of diff |                     |  |  |  |
| 01v                                                   | 01Cin vs 01C     | -0.00011 | 0.0007                 | No      | HA             | -0.0445 to 0.0396   |  |  |  |
| 01v                                                   | 01Cin vs 01B     | -0.00011 | 0.0007                 | No      | HA             | -0.0445 to 0.0396   |  |  |  |
| 01v                                                   | 01Cin vs 01B&01C | -0.00011 | 0.0007                 | No      | HA             | -0.0445 to 0.0396   |  |  |  |
| 01v                                                   | 01C vs 01B       | -0.00011 | 0.0007                 | No      | HA             | -0.0445 to 0.0396   |  |  |  |
| 01v                                                   | 01C vs 01B&01C   | -0.00011 | 0.0007                 | No      | HA             | -0.0445 to 0.0396   |  |  |  |
| 01v                                                   | 01B vs 01B&01C   | -0.00011 | 0.0007                 | No      | HA             | -0.0445 to 0.0396   |  |  |  |
| <b>0102</b>                                           | Site Analyzed    | 02       |                        |         |                |                     |  |  |  |
| One-way analysis of variance                          |                  |          |                        |         |                |                     |  |  |  |
| F value                                               | 0.432            |          |                        |         |                |                     |  |  |  |
| F value summary                                       | ---              |          |                        |         |                |                     |  |  |  |
| Are means equal (default) (P < 0.05)                  | Yes              |          |                        |         |                |                     |  |  |  |
| Number of groups                                      | 4                |          |                        |         |                |                     |  |  |  |
| F                                                     | 1.072            |          |                        |         |                |                     |  |  |  |
| R squared                                             | 0.0369           |          |                        |         |                |                     |  |  |  |
| ANOVA Table                                           | SS               | df       | MS                     |         |                |                     |  |  |  |
| Treatment (between columns)                           | 0.00272          | 3        | 0.00091                |         |                |                     |  |  |  |
| Residual (within columns)                             | 0.2627           | 8        | 0.03287                |         |                |                     |  |  |  |
| Total                                                 | 0.2654           | 11       |                        |         |                |                     |  |  |  |
| <b>Tukey's Multiple Comparison Test</b>               | Mean Diff.       | q        | Significant? P < 0.05? | Summary | 95% CI of diff |                     |  |  |  |
| 02v                                                   | 02Cin vs 02C     | -0.020   | 2.013                  | Yes     | HA             | -0.0410 to 0.0010   |  |  |  |
| 02v                                                   | 02Cin vs 02B     | -0.020   | 2.013                  | Yes     | HA             | -0.0410 to 0.0010   |  |  |  |
| 02v                                                   | 02Cin vs 02B&02C | -0.020   | 2.013                  | Yes     | HA             | -0.0410 to 0.0010   |  |  |  |
| 02v                                                   | 02C vs 02B       | -0.020   | 2.013                  | Yes     | HA             | -0.0410 to 0.0010   |  |  |  |
| 02v                                                   | 02C vs 02B&02C   | -0.020   | 2.013                  | Yes     | HA             | -0.0410 to 0.0010   |  |  |  |
| 02v                                                   | 02B vs 02B&02C   | -0.020   | 2.013                  | Yes     | HA             | -0.0410 to 0.0010   |  |  |  |
| <b>0103</b>                                           | Site Analyzed    | 03       |                        |         |                |                     |  |  |  |
| One-way analysis of variance                          |                  |          |                        |         |                |                     |  |  |  |
| F value                                               | 0.922            |          |                        |         |                |                     |  |  |  |
| F value summary                                       | ---              |          |                        |         |                |                     |  |  |  |
| Are means equal (default) (P < 0.05)                  | Yes              |          |                        |         |                |                     |  |  |  |
| Number of groups                                      | 4                |          |                        |         |                |                     |  |  |  |
| F                                                     | 0.872            |          |                        |         |                |                     |  |  |  |
| R squared                                             | 0.0333           |          |                        |         |                |                     |  |  |  |
| ANOVA Table                                           | SS               | df       | MS                     |         |                |                     |  |  |  |
| Treatment (between columns)                           | 0.00274          | 3        | 0.00091                |         |                |                     |  |  |  |
| Residual (within columns)                             | 0.2647           | 8        | 0.03309                |         |                |                     |  |  |  |
| Total                                                 | 0.2674           | 11       |                        |         |                |                     |  |  |  |
| <b>Tukey's Multiple Comparison Test</b>               | Mean Diff.       | q        | Significant? P < 0.05? | Summary | 95% CI of diff |                     |  |  |  |
| 03v                                                   | 03Cin vs 03C     | -0.00011 | 0.0007                 | No      | HA             | -0.0445 to 0.0396   |  |  |  |
| 03v                                                   | 03Cin vs 03B     | -0.00011 | 0.0007                 | No      | HA             | -0.0445 to 0.0396   |  |  |  |
| 03v                                                   | 03Cin vs 03B&03C | -0.00011 | 0.0007                 | No      | HA             | -0.0445 to 0.0396   |  |  |  |
| 03v                                                   | 03C vs 03B       | -0.00011 | 0.0007                 | No      | HA             | -0.0445 to 0.0396   |  |  |  |
| 03v                                                   | 03C vs 03B&03C   | -0.00011 | 0.0007                 | No      | HA             | -0.0445 to 0.0396   |  |  |  |
| 03v                                                   | 03B vs 03B&03C   | -0.00011 | 0.0007                 | No      | HA             | -0.0445 to 0.0396   |  |  |  |
| <b>0104</b>                                           | Site Analyzed    | 04       |                        |         |                |                     |  |  |  |
| One-way analysis of variance                          |                  |          |                        |         |                |                     |  |  |  |
| F value                                               | 0.000            |          |                        |         |                |                     |  |  |  |
| F value summary                                       | ---              |          |                        |         |                |                     |  |  |  |
| Are means equal (default) (P < 0.05)                  | Yes              |          |                        |         |                |                     |  |  |  |
| Number of groups                                      | 4                |          |                        |         |                |                     |  |  |  |
| F                                                     | 0.0000           |          |                        |         |                |                     |  |  |  |
| R squared                                             | 0.0000           |          |                        |         |                |                     |  |  |  |
| ANOVA Table                                           | SS               | df       | MS                     |         |                |                     |  |  |  |
| Treatment (between columns)                           | 0.00000          | 3        | 0.00000                |         |                |                     |  |  |  |
| Residual (within columns)                             | 0.00000          | 8        | 0.00000                |         |                |                     |  |  |  |
| Total                                                 | 0.00000          | 11       |                        |         |                |                     |  |  |  |
| <b>Tukey's Multiple Comparison Test</b>               | Mean Diff.       | q        | Significant? P < 0.05? | Summary | 95% CI of diff |                     |  |  |  |
| 04v                                                   | 04Cin vs 04C     | -0.00000 | 0.00000                | No      | HA             | -0.00000 to 0.00000 |  |  |  |
| 04v                                                   | 04Cin vs 04B     | -0.00000 | 0.00000                | No      | HA             | -0.00000 to 0.00000 |  |  |  |
| 04v                                                   | 04Cin vs 04B&04C | -0.00000 | 0.00000                | No      | HA             | -0.00000 to 0.00000 |  |  |  |
| 04v                                                   | 04C vs 04B       | -0.00000 | 0.00000                | No      | HA             | -0.00000 to 0.00000 |  |  |  |
| 04v                                                   | 04C vs 04B&04C   | -0.00000 | 0.00000                | No      | HA             | -0.00000 to 0.00000 |  |  |  |
| 04v                                                   | 04B vs 04B&04C   | -0.00000 | 0.00000                | No      | HA             | -0.00000 to 0.00000 |  |  |  |

Fig. 6C



Fig. 7A

| Table Analyzed                                           | Data 1     |        |                      |                 |
|----------------------------------------------------------|------------|--------|----------------------|-----------------|
| One-way analysis of variance                             |            |        |                      |                 |
| P value                                                  | < 0.0001   |        |                      |                 |
| P value summary                                          | ***        |        |                      |                 |
| Are means signif. different? (P < 0.05)                  | Yes        |        |                      |                 |
| Number of groups                                         | 6          |        |                      |                 |
| F                                                        | 17.49      |        |                      |                 |
| R squared                                                | 0.862      |        |                      |                 |
| ANOVA Table                                              | SS         | df     | MS                   |                 |
| Treatment (between columns)                              | 8065       | 5      | 1613                 |                 |
| Residual (within columns)                                | 1291       | 14     | 92.21                |                 |
| Total                                                    | 9355       | 19     |                      |                 |
| <b>Tukey's Multiple Comparison Test</b>                  |            |        |                      |                 |
|                                                          | Mean Diff. | q      | Significant? Summary | 95% CI of diff  |
| Klf4KONSC GFP-control (Un) vs Klf4KONSC GFP-mKlf4(Un)    | 29.87      | 6.222  | Yes **               | 7.599 to 52.15  |
| Klf4KONSC GFP-control (Un) vs Klf4KONSC GFP-dC(Un)       | 12.71      | 2.647  | No ns                | -9.566 to 34.98 |
| Klf4KONSC GFP-control (Un) vs Klf4KONSC GFP-control (2D) | 52.16      | 10.06  | Yes ***              | 28.10 to 76.22  |
| Klf4KONSC GFP-control (Un) vs Klf4KONSC GFP-mKlf4(2D)    | 49.66      | 9.576  | Yes ***              | 25.60 to 73.72  |
| Klf4KONSC GFP-control (Un) vs Klf4KONSC GFP-dC(2D)       | 48.35      | 8.223  | Yes ***              | 21.07 to 75.63  |
| Klf4KONSC GFP-mKlf4(Un) vs Klf4KONSC GFP-dC(Un)          | -17.17     | 3.575  | No ns                | -39.44 to 5.108 |
| Klf4KONSC GFP-mKlf4(Un) vs Klf4KONSC GFP-control (2D)    | 22.29      | 4.297  | No ns                | -1.771 to 46.34 |
| Klf4KONSC GFP-mKlf4(Un) vs Klf4KONSC GFP-mKlf4(2D)       | 19.79      | 3.816  | No ns                | -4.271 to 43.84 |
| Klf4KONSC GFP-mKlf4(Un) vs Klf4KONSC GFP-dC(2D)          | 18.48      | 3.143  | No ns                | -8.799 to 45.76 |
| Klf4KONSC GFP-dC(Un) vs Klf4KONSC GFP-control (2D)       | 39.45      | 7.607  | Yes **               | 15.39 to 63.51  |
| Klf4KONSC GFP-dC(Un) vs Klf4KONSC GFP-mKlf4(2D)          | 36.95      | 7.125  | Yes **               | 12.89 to 61.01  |
| Klf4KONSC GFP-dC(Un) vs Klf4KONSC GFP-dC(2D)             | 35.65      | 6.062  | Yes **               | 8.367 to 62.92  |
| Klf4KONSC GFP-control (2D) vs Klf4KONSC GFP-mKlf4(2D)    | -2.499     | 0.4508 | No ns                | -28.22 to 23.22 |
| Klf4KONSC GFP-control (2D) vs Klf4KONSC GFP-dC(2D)       | -3.806     | 0.6141 | No ns                | -32.56 to 24.95 |
| Klf4KONSC GFP-mKlf4(2D) vs Klf4KONSC GFP-dC(2D)          | -1.307     | 0.2109 | No ns                | -30.06 to 27.45 |

Fig.7B



Fig. S9D

| shCon&Con OE    | mCherry& Tu1&mCherry&GFP | Tuj1&mCherry&GFP | Tuj1&mCherry&GFP/mCherry&GFP | #1 | #2 | #3          | #4          | #5          | #6 |
|-----------------|--------------------------|------------------|------------------------------|----|----|-------------|-------------|-------------|----|
| 5               | 2                        | 40               | 40                           | 25 | 50 | 14.28571428 | 40          |             |    |
| 4               | 2                        | 50               | 50                           | 25 | 50 | 28.57142857 | 57.14285714 | 16.66666667 | 50 |
| 7               | 2                        | 28.57143         | 28.57143                     | #3 | 40 | 60          | 20          | 42.85714286 | 50 |
|                 |                          |                  |                              | #4 |    |             |             |             |    |
|                 |                          |                  |                              | #5 |    |             |             |             |    |
| shStau1&Con OE  | 4                        | 2                | 50                           |    |    |             |             |             | 40 |
|                 | 7                        | 4                | 57.14286                     |    |    |             |             |             | 50 |
|                 | 5                        | 3                | 60                           |    |    |             |             |             | 50 |
| shCon&Klf4 OE   | 7                        | 1                | 14.28571                     |    |    |             |             |             | 40 |
|                 | 6                        | 1                | 16.66667                     |    |    |             |             |             | 50 |
|                 | 5                        | 1                | 20                           |    |    |             |             |             | 40 |
| shStau1&Klf4 OE | 10                       | 4                | 40                           |    |    |             |             |             | 50 |
|                 | 6                        | 3                | 42.85714                     |    |    |             |             |             | 40 |
|                 | 4                        | 2                | 50                           |    |    |             |             |             | 40 |
|                 | 5                        | 2                | 40                           |    |    |             |             |             | 50 |
|                 | 4                        | 2                | 50                           |    |    |             |             |             | 40 |

  

| Table Analyzed | Date |
|----------------|------|
| 1              | 1    |

  

| One-way analysis of variance | P value  | P value summary | Are means signif. different? (P < 0.05) | Number of groups | F     | R squared |
|------------------------------|----------|-----------------|-----------------------------------------|------------------|-------|-----------|
| One-way analysis of variance | < 0.0001 | ***             | Yes                                     | 4                | 31.19 | 0.8948    |

  

| ANOVA Table                 | SS    | df | MS    |
|-----------------------------|-------|----|-------|
| Treatment (between columns) | 2727  | 3  | 908.9 |
| Residual (within columns)   | 320.6 | 11 | 29.14 |
| Total                       | 3047  | 14 |       |

  

| Tukey's Multiple Comparison Test  | Mean Diff. | q     | Significant? | Summary | 95% CI of diff    |
|-----------------------------------|------------|-------|--------------|---------|-------------------|
| shCon&Con OE vs shStau1&Con OE    | -24.52     | 7.868 | Yes          | **      | -40.74 to -8.311  |
| shCon&Con OE vs shCon&Klf4 OE     | 14.21      | 4.558 | No           | ns      | -2.007 to 30.42   |
| shCon&Con OE vs shStau1&Klf4 OE   | -14.29     | 5.293 | Yes          | *       | -28.33 to -0.2447 |
| shStau1&Con OE vs shCon&Klf4 OE   | 38.73      | 12.43 | Yes          | ***     | 22.52 to 54.94    |
| shStau1&Con OE vs shStau1&Klf4 OE | 10.24      | 3.793 | No           | ns      | -3.803 to 24.28   |
| shCon&Klf4 OE vs shStau1&Klf4 OE  | -28.49     | 10.56 | Yes          | ***     | -42.53 to -14.45  |

Fig. S11B

| shCon&Con OE    | mCherry& Tu1&mCherry&GFP | Tuj1&mCherry&GFP | Tuj1&mCherry&GFP/mCherry&GFP | #1 | #2 | #3          | #4          | #5          | #6 |
|-----------------|--------------------------|------------------|------------------------------|----|----|-------------|-------------|-------------|----|
| 5               | 2                        | 40               | 40                           | 25 | 50 | 14.28571428 | 40          |             |    |
| 4               | 2                        | 50               | 50                           | 25 | 50 | 28.57142857 | 57.14285714 | 16.66666667 | 50 |
| 7               | 2                        | 28.57143         | 28.57143                     | #3 | 40 | 60          | 20          | 42.85714286 | 50 |
|                 |                          |                  |                              | #4 |    |             |             |             |    |
|                 |                          |                  |                              | #5 |    |             |             |             |    |
| shStau1&Con OE  | 4                        | 2                | 50                           |    |    |             |             |             | 40 |
|                 | 7                        | 4                | 57.14286                     |    |    |             |             |             | 50 |
|                 | 5                        | 3                | 60                           |    |    |             |             |             | 50 |
| shCon&Klf4 OE   | 7                        | 1                | 14.28571                     |    |    |             |             |             | 40 |
|                 | 6                        | 1                | 16.66667                     |    |    |             |             |             | 50 |
|                 | 5                        | 1                | 20                           |    |    |             |             |             | 40 |
| shStau1&Klf4 OE | 10                       | 4                | 40                           |    |    |             |             |             | 50 |
|                 | 6                        | 3                | 42.85714                     |    |    |             |             |             | 40 |
|                 | 4                        | 2                | 50                           |    |    |             |             |             | 40 |
|                 | 5                        | 2                | 40                           |    |    |             |             |             | 50 |
|                 | 4                        | 2                | 50                           |    |    |             |             |             | 40 |

  

| Table Analyzed | Date |
|----------------|------|
| 1              | 1    |

  

| One-way analysis of variance | P value  | P value summary | Are means signif. different? (P < 0.05) | Number of groups | F     | R squared |
|------------------------------|----------|-----------------|-----------------------------------------|------------------|-------|-----------|
| One-way analysis of variance | < 0.0001 | ***             | Yes                                     | 4                | 31.19 | 0.8948    |

  

| ANOVA Table                 | SS    | df | MS    |
|-----------------------------|-------|----|-------|
| Treatment (between columns) | 2727  | 3  | 908.9 |
| Residual (within columns)   | 320.6 | 11 | 29.14 |
| Total                       | 3047  | 14 |       |

  

| Tukey's Multiple Comparison Test  | Mean Diff. | q     | Significant? | Summary | 95% CI of diff    |
|-----------------------------------|------------|-------|--------------|---------|-------------------|
| shCon&Con OE vs shStau1&Con OE    | -24.52     | 7.868 | Yes          | **      | -40.74 to -8.311  |
| shCon&Con OE vs shCon&Klf4 OE     | 14.21      | 4.558 | No           | ns      | -2.007 to 30.42   |
| shCon&Con OE vs shStau1&Klf4 OE   | -14.29     | 5.293 | Yes          | *       | -28.33 to -0.2447 |
| shStau1&Con OE vs shCon&Klf4 OE   | 38.73      | 12.43 | Yes          | ***     | 22.52 to 54.94    |
| shStau1&Con OE vs shStau1&Klf4 OE | 10.24      | 3.793 | No           | ns      | -3.803 to 24.28   |
| shCon&Klf4 OE vs shStau1&Klf4 OE  | -28.49     | 10.56 | Yes          | ***     | -42.53 to -14.45  |

Fig. S12A



## Supplementary References

1. Sugimoto, Y. *et al.* hiCLIP reveals the in vivo atlas of mRNA secondary structures recognized by Staufen 1. *Nature* **519**, 491-494 (2015).
2. Ricci, E.P. *et al.* Staufen1 senses overall transcript secondary structure to regulate translation. *Nat. Struct. Mol. Biol.* **21**, 26-35 (2014).
